# Supplementary material for: Large piezoelectric response of van der Waals layered solids
Source: Royal Society of Chemistry journal article supplement (doi:10.1039/c8tc02560f), 2018-01-01
Supplement: c8tc02560f1.zip [file c8tc02560f1.zip]

This file contains the relaxed structures of each candidate in Figure 5.

Ag1I1/icsd\_001899

1.0000000000000000

|                     |                    |                     |
|---------------------|--------------------|---------------------|
| 4.6187383060000000  | 0.0000115320000000 | -0.0000000020000000 |
| -2.3093744219999999 | 3.9997196370000001 | 0.0000000210000000  |
| 0.0000001390000000  | 0.0000002580000000 | 15.1423606199999998 |

I      Ag  
4      4

Direct

|                    |                    |                    |
|--------------------|--------------------|--------------------|
| 0.0000162300000000 | 0.0000306399999985 | 0.0315701999999973 |
| 0.9999837499999984 | 0.9999693500000006 | 0.5315701999999973 |
| 0.6666112899999987 | 0.3332271100000028 | 0.2815061900000018 |
| 0.3333887000000004 | 0.6667728799999963 | 0.7815061900000018 |
| 0.0000524200000029 | 0.0001007099999981 | 0.7183438200000012 |
| 0.9999475999999987 | 0.9998993000000027 | 0.2183438200000012 |
| 0.6666344200000012 | 0.3332714599999989 | 0.4685798000000005 |
| 0.3333655800411727 | 0.6667285500426005 | 0.9679194009875249 |

Ag2Ge1S3/icsd\_041711/

1.0000000000000000

|                     |                    |                     |
|---------------------|--------------------|---------------------|
| 0.0000000500000000  | 0.0000000350000000 | 6.4959046029999996  |
| 5.8617873109999996  | 3.5188509410000002 | 0.0000000130000000  |
| -5.8617873810000001 | 3.5188510960000001 | -0.0000000390000000 |

Ge      S      Ag  
2      6      4

Direct

|                    |                    |                    |
|--------------------|--------------------|--------------------|
| 0.4582527499999998 | 0.6600615199999993 | 0.6600615300000001 |
| 0.9582527399999989 | 0.3399384900000015 | 0.3399384699999999 |
| 0.8761921500000014 | 0.3540623100000033 | 0.0352808900000028 |
| 0.8761920999999973 | 0.0352808499999995 | 0.3540622000000013 |
| 0.3761921500000014 | 0.6459376800000030 | 0.9647191199999980 |
| 0.3761921099999981 | 0.9647191299999989 | 0.6459377899999978 |
| 0.8218864999999980 | 0.6424133800000007 | 0.6424133399999974 |
| 0.3218864899999971 | 0.3575866500000018 | 0.3575866600000026 |
| 0.4922382999999968 | 0.2976021099999997 | 0.9938819999999993 |
| 0.4922382000000027 | 0.9938819300000006 | 0.2976021899999992 |
| 0.9922382999999968 | 0.7023978599999978 | 0.0061180000000007 |
| 0.9906987785256824 | 0.0061180800142218 | 0.7023978100010912 |

Al2Cd1Cl8/icsd\_062037/

1.0000000000000000

|                     |                      |                    |
|---------------------|----------------------|--------------------|
| 12.8219399319999994 | -0.00000000630000000 | 0.0075120640000000 |
| 0.0000000200000000  | 6.431125599999999    | 0.0000000400000000 |
| -0.3496862020000000 | 0.0000000890000000   | 7.0388796219999996 |

| Cl | Al | Cd |
|----|----|----|
| 16 | 4  | 2  |

Direct

|                     |                     |                     |
|---------------------|---------------------|---------------------|
| 0.06051638999999965 | 0.38415231999999983 | 0.65730049999999981 |
| 0.56051638000000028 | 0.61584767000000008 | 0.65730050999999989 |
| 0.94218665999999973 | 0.05080510999999989 | 0.30294219000000031 |
| 0.44218664999999965 | 0.94919489000000011 | 0.30294218000000023 |
| 0.08534729000000014 | 0.57751532999999971 | 0.16389707999999981 |
| 0.58534728000000006 | 0.42248468999999974 | 0.16389708999999990 |
| 0.95318198999999974 | 0.92066332999999964 | 0.78404463999999976 |
| 0.45318198999999974 | 0.07933667999999973 | 0.78404462000000031 |
| 0.70121887999999990 | 0.88097562000000010 | 0.05193809000000002 |
| 0.20121886999999982 | 0.11902437999999990 | 0.05193812000000026 |
| 0.82846117999999979 | 0.55821312999999986 | 0.40775658999999982 |
| 0.32846117999999979 | 0.44178687000000014 | 0.40775659999999990 |
| 0.81505200000000014 | 0.41177855000000011 | 0.91548381999999986 |
| 0.31505201000000023 | 0.58822143999999981 | 0.91548382999999994 |
| 0.18873950999999978 | 0.91470143000000009 | 0.53588796999999974 |
| 0.68873950999999978 | 0.08529854999999974 | 0.53588794000000021 |
| 0.04437777999999978 | 0.06250958999999977 | 0.56184037999999996 |
| 0.54437777999999978 | 0.93749041000000023 | 0.56184036999999988 |
| 0.24037442000000020 | 0.43315868999999991 | 0.14952741999999983 |
| 0.74037441000000011 | 0.56684131000000009 | 0.14952739999999966 |
| 0.49954390999999999 | 0.75065063000000026 | 0.00078134000000032 |
| 0.9995051656321098  | 0.2493494000192804  | -0.0006392992901723 |

Al2S4Zn1/icsd\_609280

1.0000000000000000

|                    |                     |                      |
|--------------------|---------------------|----------------------|
| 3.6636340563899998 | 0.0000026308627393  | 0.0000275992274570   |
| 1.8318147557300000 | -3.1728014900099999 | 0.0000275803985514   |
| 1.8317916685800000 | -1.0575854156700000 | -11.7707562237999994 |

| S | Zn | Al |
|---|----|----|
| 4 | 1  | 2  |

Direct

|                     |                     |                     |
|---------------------|---------------------|---------------------|
| 0.87357701999999990 | 0.87357701999999990 | 0.37927254000000023 |
| 0.12756774000000035 | 0.12756774999999972 | 0.61729349000000016 |
| 0.30028897999999977 | 0.30028897999999977 | 0.09911664999999991 |
| 0.70552070000000010 | 0.70552070000000010 | 0.88346235000000021 |
| 0.22837469000000025 | 0.22837470000000034 | 0.31487374000000030 |
| 0.99936280000000001 | 0.99936280000000001 | 0.00190515999999997 |
| 0.76902487655000000 | 0.7690248665499995  | 0.69292564176000015 |

As1K1Sn1/icsd\_040815

1.0000000000000000

|                     |                     |                     |
|---------------------|---------------------|---------------------|
| 4.1450014599999996  | -0.0000075610000000 | 0.0000000000000000  |
| -2.0725072729999998 | 3.589639255999999   | 0.0000000030000000  |
| 0.0000000000000000  | 0.0000000090000000  | 12.6855507070000009 |

|    |   |    |
|----|---|----|
| As | K | Sn |
| 2  | 2 | 2  |

Direct

|                    |                    |                    |
|--------------------|--------------------|--------------------|
| 0.6666703499999996 | 0.3333576200000010 | 0.1720537300000018 |
| 0.3333296500000031 | 0.6666423799999990 | 0.6720537300000018 |
| 0.6666696899999991 | 0.3333320200000003 | 0.4949152299999966 |
| 0.3333303100000009 | 0.6666679799999997 | 0.9949152299999966 |
| 0.9999952300000032 | 0.9999724600000022 | 0.7781310399999981 |
| 0.0000047700009850 | 0.0000275400019743 | 0.2773427415468233 |

Au207Se2/icsd\_037009/

1.0000000000000000

|                     |                     |                     |
|---------------------|---------------------|---------------------|
| 6.9673389160000001  | -0.0000000050000000 | -0.0000000030000000 |
| 0.0000000090000000  | 11.632966924999998  | -0.0000000400000000 |
| -0.0000000010000000 | -0.0000000110000000 | 3.9518042539999998  |

|    |    |    |
|----|----|----|
| Au | 0  | Se |
| 4  | 14 | 4  |

Direct

|                    |                    |                    |
|--------------------|--------------------|--------------------|
| 0.6932117500000032 | 0.4348840700000025 | 0.5015570099999991 |
| 0.3067882400000030 | 0.5651159299999975 | 0.5015570099999991 |
| 0.8067882499999968 | 0.9348840700000025 | 0.5015570099999991 |
| 0.1932117599999970 | 0.0651159299999975 | 0.5015570099999991 |
| 0.8406813599999978 | 0.5827079000000026 | 0.5717221000000023 |
| 0.1593186300000013 | 0.4172921099999982 | 0.5717221199999969 |
| 0.6593186400000022 | 0.0827079000000026 | 0.5717221100000032 |
| 0.3406813599999978 | 0.9172920999999974 | 0.5717221100000032 |
| 0.5327427699999987 | 0.2888751300000010 | 0.4913288999999992 |
| 0.4672572200000005 | 0.7111248699999990 | 0.4913288899999984 |
| 0.9672572300000013 | 0.7888751300000010 | 0.4913288799999975 |
| 0.0327427799999995 | 0.2111248699999990 | 0.4913288999999992 |
| 0.8757936100000023 | 0.3727448799999991 | 0.1307393299999973 |
| 0.1242063899999977 | 0.6272551100000001 | 0.1307393200000035 |
| 0.6242063899999977 | 0.8727448799999991 | 0.1307393299999973 |
| 0.3757936100000023 | 0.1272551100000001 | 0.1307393299999973 |
| 0.5000000000000000 | 0.5000000000000000 | 0.8232645100000013 |
| 0.0000000000000000 | 0.0000000000000000 | 0.8232645100000013 |
| 0.6085521099999980 | 0.1738664100000022 | 0.2282204099999987 |
| 0.3914478900000020 | 0.8261335899999978 | 0.2282203999999979 |
| 0.8914478900000020 | 0.6738664100000022 | 0.2282203999999979 |
| 0.1085521099996348 | 0.3261335899976050 | 0.2256899202901711 |

BiN1/icsd\_162871/  
 1.000000000000000  
 2.5162508049999999 -0.0000045050000000 0.0000890240000000  
 1.2581293050000000 -2.1791420360000000 0.0000714200000000  
 1.2580174690000001 -0.7263445470000000 -3.2265456650000002

B N  
 1 1

Direct  
 0.9997923999999969 0.9997419199999982 0.0007238800000025  
 0.3316746283105884 0.3316250540524259 0.0050753584116843

Bi1Cl1Te1/icsd\_079362/  
 1.000000000000000  
 4.2567608750000003 0.0000005920000000 0.0000000200000000  
 -2.1283799150000000 3.6864605859999999 0.0000000070000000  
 0.0000000360000000 0.0000001020000000 12.5912648829999991

Te Bi Cl  
 2 2 2

Direct  
 0.3333345899999998 0.6666692299999966 0.7779750799999974  
 0.6666653999999994 0.3333307600000026 0.2779750799999974  
 0.3333317900000026 0.6666636499999967 0.1374216299999986  
 0.6666682099999974 0.3333363500000033 0.6374216399999995  
 0.9999986500000020 0.9999975300000017 0.0027032899999995  
 0.0000013600177028 0.0000024800219737 0.5019090886157126

Bi1I1Te1/icsd\_074501/  
 1.000000000000000  
 4.3648366259999998 0.0000017630000000 0.0000861650000000  
 -2.1824167710000002 3.7800567350000001 -0.0000000440000000  
 -0.0000280330000000 -0.0000161510000000 6.9254158840000004

I Te Bi  
 1 1 1

Direct  
 0.3333217200000007 0.6666608600000004 0.2265834499999997  
 0.6666763400000022 0.3333381699999975 0.6718468500000014  
 0.0000019176414637 0.0000009638304330 0.919425743396316

Bi1In103/icsd\_171756/

1.000000000000000

|                     |                     |                    |
|---------------------|---------------------|--------------------|
| 6.0106130249999996  | 0.0000000050000000  | 0.0000000180000000 |
| -0.0000000020000000 | 5.6706748690000000  | 0.0000000150000000 |
| -0.0000000030000000 | -0.0000000030000000 | 8.3119882890000003 |

|    |    |    |
|----|----|----|
| Bi | 0  | In |
| 4  | 12 | 4  |

Direct

|                    |                    |                    |
|--------------------|--------------------|--------------------|
| 0.5563852399999973 | 0.5011933899999974 | 0.7880689500000031 |
| 0.4436147700000035 | 0.4988066000000018 | 0.2880689500000031 |
| 0.9436147700000035 | 0.0011933899999974 | 0.2880689500000031 |
| 0.0563852299999965 | 0.9988066100000026 | 0.7880689500000031 |
| 0.4500743500000013 | 0.1173321400000020 | 0.7584580199999991 |
| 0.5499256499999987 | 0.8826678599999980 | 0.2584580199999991 |
| 0.0499256499999987 | 0.6173321400000020 | 0.2584580199999991 |
| 0.9500743500000013 | 0.3826678599999980 | 0.7584580199999991 |
| 0.7083489899999975 | 0.3045060099999972 | 0.4358639000000011 |
| 0.2916510000000017 | 0.6954939900000028 | 0.9358639000000011 |
| 0.7916510000000017 | 0.8045060099999972 | 0.9358639000000011 |
| 0.2083489999999983 | 0.1954939900000028 | 0.4358639000000011 |
| 0.8391917399999969 | 0.8421480700000004 | 0.5318806300000034 |
| 0.1608082600000031 | 0.1578519299999996 | 0.0318806300000034 |
| 0.6608082600000031 | 0.3421480700000004 | 0.0318806300000034 |
| 0.3391917399999969 | 0.6578519299999996 | 0.5318806300000034 |
| 0.4978712500000029 | 0.0007371599999999 | 0.0154285099999996 |
| 0.5021287400000034 | 0.9992628400000001 | 0.5154285099999996 |
| 0.0021287499999971 | 0.5007371599999999 | 0.5154285099999996 |
| 0.9978712499994025 | 0.4992628399993637 | 0.0142254284204413 |

Bi2Ge105/icsd\_062488

1.0000000000000000

|                     |                     |                    |
|---------------------|---------------------|--------------------|
| -0.0006154650000000 | -0.0000001240000000 | 5.3649245880000000 |
| -0.0000913400000000 | -5.5246340810000003 | 0.0000002130000000 |
| 7.8681973500000000  | 2.7624485179999998  | 0.0006956300000000 |

| Ge | Bi | O  |
|----|----|----|
| 2  | 4  | 10 |

Direct

|                    |                    |                    |
|--------------------|--------------------|--------------------|
| 0.7313356299999967 | 0.6880434400000013 | 0.0031349599999970 |
| 0.2313355699999988 | 0.3151070099999984 | 0.0031649200000032 |
| 0.7475566700000016 | 0.3945651299999966 | 0.3394694999999999 |
| 0.2475618499999968 | 0.9448980900000024 | 0.3394647100000014 |
| 0.7475796100000025 | 0.0582530599999984 | 0.6668408099999965 |
| 0.2475743899999969 | 0.6085880500000016 | 0.6668355099999985 |
| 0.4822460999999976 | 0.2584898899999999 | 0.5049600500000011 |
| 0.9822421900000009 | 0.2464619100000007 | 0.5049584300000021 |
| 0.4822356700000014 | 0.7566881500000022 | 0.5013405899999981 |
| 0.9822394899999978 | 0.7446583099999984 | 0.5013390000000015 |
| 0.6748503299999982 | 0.7277330599999985 | 0.8075067899999979 |
| 0.1747823400000001 | 0.0797217799999999 | 0.8075664500000030 |
| 0.6748341899999986 | 0.9233790999999982 | 0.1987572900000032 |
| 0.1749023599999973 | 0.2754901799999985 | 0.1988168099999967 |
| 0.0578618400000011 | 0.5990057200000010 | 0.0031409400000015 |
| 0.5559978209201446 | 0.4041170171367740 | 0.0031030941968169 |

Bi2Mo106/icsd\_017070

1.0000000000000000

|                    |                     |                     |
|--------------------|---------------------|---------------------|
| 5.4842337399999996 | 0.0148160910000000  | 0.0090554410000000  |
| 0.0448694990000000 | 16.3518810439999989 | -0.0525108740000000 |
| 0.0090491760000000 | -0.0175211890000000 | 5.4821142839999997  |

Mo Bi O

4 8 24

Direct

|                    |                    |                    |
|--------------------|--------------------|--------------------|
| 0.5256916299999972 | 0.9996792499999998 | 0.5130936500000018 |
| 0.0151255800000030 | 0.5000309699999974 | 0.5286655800000020 |
| 0.4977385700000028 | 0.5001851099999968 | 0.0282753600000021 |
| 0.0264438199999972 | 0.0001356900000005 | 0.9959203100000025 |
| 0.5242462000000003 | 0.1717602200000030 | 0.0249031800000026 |
| 0.9985376099999996 | 0.3274821400000008 | 0.0236727500000029 |
| 0.4942964899999964 | 0.6723997100000005 | 0.5166572899999977 |
| 0.0159386899999987 | 0.8284414900000030 | 0.5205650300000002 |
| 0.5293352999999996 | 0.8280265400000033 | 0.9969272800000013 |
| 0.0194330400000027 | 0.6710988199999974 | 0.0310112100000026 |
| 0.5270204099999987 | 0.3293036199999975 | 0.5407713700000016 |
| 0.0400740700000028 | 0.1715681299999972 | 0.4983915899999971 |
| 0.7546739100000011 | 0.2505082599999966 | 0.2606447699999990 |
| 0.2647964000000016 | 0.2496827900000014 | 0.7593304199999977 |
| 0.2569570100000007 | 0.7523620799999975 | 0.2558635700000025 |
| 0.7477868300000026 | 0.7477821900000023 | 0.7485896399999987 |
| 0.2478097400000010 | 0.7498251000000025 | 0.7553219899999988 |
| 0.7547692999999995 | 0.7500428700000015 | 0.2520177800000027 |
| 0.7661060399999968 | 0.2475221500000018 | 0.7614011100000013 |
| 0.2544524400000014 | 0.2522054900000015 | 0.2562371499999969 |
| 0.6887090600000008 | 0.5172045199999999 | 0.2889263499999970 |
| 0.1714653100000021 | 0.0187230100000022 | 0.7051117600000012 |
| 0.2867043199999983 | 0.9806364599999995 | 0.1845848500000002 |
| 0.8241974100000036 | 0.5200028200000020 | 0.7893524200000002 |
| 0.3056751299999974 | 0.4824886099999972 | 0.6731513499999977 |
| 0.7857239200000024 | 0.9813220599999966 | 0.3192955800000021 |
| 0.6720751599999986 | 0.0196978500000000 | 0.8010008600000020 |
| 0.2091751900000034 | 0.4798860100000013 | 0.1743409799999966 |
| 0.4500317299999992 | 0.1086100699999974 | 0.4305943800000023 |
| 0.9347023899999982 | 0.3913178999999971 | 0.4616432099999983 |
| 0.4440618300000025 | 0.6093942700000028 | 0.9413831099999967 |
| 0.9321144999999973 | 0.8905363900000012 | 0.9407990600000034 |
| 0.4349232000000001 | 0.8910695699999991 | 0.5615261299999972 |
| 0.0616237999999996 | 0.6091969800000001 | 0.4316598699999972 |
| 0.5820937599999993 | 0.3916991700000025 | 0.9480130900000034 |
| 0.9554932259040743 | 0.1081697226784104 | 0.0785317925115255 |

Bi2O3/icsd\_041764

1.0000000000000000

|                    |                     |                     |
|--------------------|---------------------|---------------------|
| 7.8006164519999999 | -0.0000002430000000 | -0.0000003370000000 |
| 0.0000000020000000 | 7.8006165320000003  | 0.0000003216000000  |

|                     |                    |                     |
|---------------------|--------------------|---------------------|
| -0.0000002050000000 | 0.0000023930000000 | 5.5805121570000003  |
| Bi 0                |                    |                     |
| 8 12                |                    |                     |
| Direct              |                    |                     |
| 0.7561726699999980  | 0.5199998300000033 | 0.2303332800000035  |
| 0.2561727300000030  | 0.9800000899999972 | 0.2696667100000028  |
| 0.2438272699999970  | 0.4800009200000019 | 0.2303329399999967  |
| 0.7438273400000028  | 0.0199991499999967 | 0.26966671300000020 |
| 0.5199995400000006  | 0.2438269499999990 | 0.7696667100000028  |
| 0.9800003400000037  | 0.7438276700000017 | 0.7303328899999997  |
| 0.4800005199999973  | 0.7561723299999983 | 0.76966671599999974 |
| 0.0199995400000006  | 0.2561730199999985 | 0.7303332899999972  |
| 0.8115805500000022  | 0.7899478200000019 | 0.0323821699999982  |
| 0.3115807900000007  | 0.7100522100000006 | 0.4676176199999986  |
| 0.1884194699999995  | 0.2100524100000030 | 0.0323822499999977  |
| 0.6884193100000005  | 0.2899475600000017 | 0.4676176299999995  |
| 0.7899477699999977  | 0.1884194100000016 | 0.9676177699999968  |
| 0.7100522599999977  | 0.6884191700000031 | 0.5323823499999989  |
| 0.2100522300000023  | 0.8115807200000020 | 0.9676177500000023  |
| 0.2899476999999990  | 0.3115807000000004 | 0.5323823599999997  |
| 0.9999999599999967  | 0.4999999799999983 | 0.9026785599999982  |
| 0.5000000300000025  | 0.0000000200000017 | 0.5973214300000009  |
| 0.4999999799999983  | 0.9999998899999980 | 0.0973214400000018  |
| 0.9999999899529067  | 0.5000001405497151 | 0.4008865897777473  |

Bi206W1/icsd\_023584

1.0000000000000000

|                     |                     |                     |
|---------------------|---------------------|---------------------|
| 5.5084358379999996  | -0.0000000170000000 | -0.0000000180000000 |
| -0.0000000170000000 | -0.0000346940000000 | -5.4976013789999998 |
| 0.0000000010000000  | 8.2685481000000003  | 2.7488606610000001  |

|    |    |   |
|----|----|---|
| 0  | Bi | W |
| 12 | 4  | 2 |

Direct

|                    |                    |                    |
|--------------------|--------------------|--------------------|
| 0.2589922599999994 | 0.9916806600000001 | 0.4969291100000035 |
| 0.7410056599999990 | 0.4947479200000018 | 0.5030843099999984 |
| 0.2410077400000006 | 0.4916806600000001 | 0.4969291100000035 |
| 0.7589943300000002 | 0.9947479200000018 | 0.5030843099999984 |
| 0.2452517899999975 | 0.7986853499999995 | 0.0420532699999967 |
| 0.7546560400000004 | 0.7567179500000023 | 0.9579342400000002 |
| 0.2547482100000025 | 0.2986853499999995 | 0.0420532699999967 |
| 0.7453439599999996 | 0.2567179500000023 | 0.9579342400000002 |
| 0.4218989000000022 | 0.4520040199999968 | 0.7823176799999985 |
| 0.5781057700000005 | 0.6697200999999993 | 0.2176681799999969 |
| 0.0781010999999978 | 0.9520040299999977 | 0.7823176799999985 |
| 0.9218942299999995 | 0.1697200999999993 | 0.2176681799999969 |
| 0.0215659500000029 | 0.2946354799999966 | 0.6545508199999972 |
| 0.9784390200000033 | 0.6400864100000021 | 0.3454666700000004 |
| 0.4784340499999971 | 0.7946354799999966 | 0.6545508199999972 |
| 0.5215609799999967 | 0.1400864100000021 | 0.3454666599999996 |
| 0.5000070099999974 | 0.4917221099999978 | 0.9999957200000011 |



0.9999929900056163 0.9935410889129104 0.9999957276322544

Br103Tl1/icsd\_076966/

1.000000000000000

|                    |                    |                    |
|--------------------|--------------------|--------------------|
| 4.4349828909999998 | 0.0068168340000000 | 0.0065270690000000 |
| 0.2079941490000000 | 4.4301099270000002 | 0.0065270380000000 |
| 0.2079939460000000 | 0.1987631270000000 | 4.4256535699999997 |

|    |   |    |
|----|---|----|
| Tl | 0 | Br |
| 1  | 3 | 1  |

Direct

|                    |                    |                    |
|--------------------|--------------------|--------------------|
| 0.0165408499999984 | 0.0165408299999967 | 0.0165408200000030 |
| 0.1189589800000022 | 0.5590771700000019 | 0.5590771700000019 |
| 0.5590771899999964 | 0.1189590999999979 | 0.5590771399999994 |
| 0.5590771600000011 | 0.5590771199999978 | 0.1189590999999979 |
| 0.5004470658097658 | 0.5004470056636733 | 0.4980859281196089 |

Br7Nb3S1/icsd\_081078

1.000000000000000

|                     |                     |                     |
|---------------------|---------------------|---------------------|
| 7.1280903799999997  | 0.0000035740000000  | -0.0000257030000000 |
| -3.5640421000000000 | 6.1730998460000004  | -0.0000000580000000 |
| -0.0000230340000000 | -0.0000133460000000 | 6.3123794630000001  |

|    |   |    |
|----|---|----|
| Nb | S | Br |
| 3  | 1 | 7  |

Direct

|                    |                    |                    |
|--------------------|--------------------|--------------------|
| 0.6041028200000014 | 0.8020514000000034 | 0.2231915799999982 |
| 0.1979573500000029 | 0.3959057499999972 | 0.2231912900000026 |
| 0.1979573500000029 | 0.8020515999999986 | 0.2231913000000034 |
| 0.3333421000000030 | 0.6666710800000004 | 0.4988291000000018 |
| 0.0000037200000023 | 0.0000018400000030 | 0.9992626100000024 |
| 0.8313453000000024 | 0.1686673600000006 | 0.4526470200000006 |
| 0.3373352600000032 | 0.1686676699999978 | 0.4526464799999985 |
| 0.8313452399999974 | 0.6626779099999993 | 0.4526469500000019 |
| 0.9944119000000029 | 0.4972059199999990 | 0.9530973800000027 |
| 0.5027995100000027 | 0.0055936199999991 | 0.9530981699999970 |
| 0.5027994431683129 | 0.4972058565750513 | 0.9515139413340962 |

Br7S1Ta3/icsd\_051101

1.000000000000000

|                     |                    |                     |
|---------------------|--------------------|---------------------|
| -0.0000006000000000 | 7.0910250350000004 | 0.0000057660000000  |
| -6.1458193300000001 | 3.5455130349999999 | -0.0010341510000000 |
| -0.0542906850000000 | 3.5455176700000002 | 6.3201224470000001  |

|   |    |    |
|---|----|----|
| S | Br | Ta |
| 1 | 7  | 3  |

Direct

|                    |                    |                    |
|--------------------|--------------------|--------------------|
| 0.3500193400000029 | 0.4092597499999968 | 0.8907008099999985 |
| 0.2630136800000002 | 0.0813085300000012 | 0.3926649100000006 |
| 0.8724569000000031 | 0.4162192499999975 | 0.8388664100000014 |

|                    |                    |                    |
|--------------------|--------------------|--------------------|
| 0.7902882599999970 | 0.0786411599999965 | 0.3407836100000026 |
| 0.3801102799999967 | 0.9092691199999976 | 0.8393268399999982 |
| 0.8712927300000004 | 0.9092692199999988 | 0.8393267800000004 |
| 0.7888397299999994 | 0.5861571800000007 | 0.3436524899999966 |
| 0.2813514500000025 | 0.5861568999999989 | 0.3436523800000018 |
| 0.3517446800000030 | 0.6822657199999966 | 0.6142446100000001 |
| 0.3525486599999965 | 0.2788265000000010 | 0.6126905799999989 |
| 0.7567184357231669 | 0.2788406571050672 | 0.6111083337459512 |

Cl1K103/icsd\_009483

1.0000000000000000

|                    |                    |                    |
|--------------------|--------------------|--------------------|
| 4.3085742319999998 | 0.0411920130000000 | 0.0381250420000000 |
| 0.4015798160000000 | 4.2900121369999997 | 0.0381283800000000 |
| 0.4015796860000000 | 0.3692743890000000 | 4.2742619460000002 |

K      O      Cl  
1      3      1

Direct

|                    |                    |                    |
|--------------------|--------------------|--------------------|
| 0.0367725600000028 | 0.0367726300000015 | 0.0367726099999999 |
| 0.1592120899999969 | 0.5828666100000035 | 0.5828665700000002 |
| 0.5828666000000027 | 0.1592113399999988 | 0.5828671299999968 |
| 0.5828664900000007 | 0.5828670900000006 | 0.1592115099999987 |
| 0.5134820327271568 | 0.5134821047135628 | 0.5109390208069109 |

Cl2Mg1/icsd\_051245

1.0000000000000000

|                     |                     |                     |
|---------------------|---------------------|---------------------|
| 3.8735546809999999  | -0.0000000020000000 | -0.0000000080000000 |
| 0.0000000020000000  | 3.8735546820000000  | -0.0000000020000000 |
| -0.0000000020000000 | -0.0000000010000000 | 5.2360543479999997  |

Mg      Cl  
1      2

Direct

|                      |                    |                    |
|----------------------|--------------------|--------------------|
| 0.5000000000000000   | 0.5000000000000000 | 0.0000000000000000 |
| 0.5000000000000000   | 0.0000000000000000 | 0.7421571699999987 |
| -0.00000000000098609 | 0.4999999999995069 | 0.2559329949724448 |

Cl2Zr1/icsd\_030052

1.0000000000000000

|                    |                     |                     |
|--------------------|---------------------|---------------------|
| 3.3866709730000002 | 0.0000008050000000  | 0.0000334000000000  |
| 1.6933347880000000 | -2.9329435230000001 | 0.0000333960000000  |
| 1.6932713760000000 | -0.9776107040000001 | -6.4658617539999996 |

Zr      Cl  
1      2

Direct

|                    |                    |                    |
|--------------------|--------------------|--------------------|
| 0.0000688499999981 | 0.0000688399999973 | 0.9997933799999998 |
| 0.2444487699999982 | 0.2444487599999974 | 0.2666721300000034 |
| 0.4218668831394491 | 0.4218668831306521 | 0.7343810689320395 |

Co1F3/icsd\_029133

1.0000000000000000

|                     |                    |                     |
|---------------------|--------------------|---------------------|
| 4.7066184719999997  | 0.0000009750000000 | -0.0001073400000000 |
| -2.3533083800000001 | 4.0760432220000000 | -0.0000017290000000 |
| 0.0001591270000000  | 0.0000892020000000 | 6.7034476930000002  |

Co F  
3 9

Direct

|                    |                    |                    |
|--------------------|--------------------|--------------------|
| 0.9999996999999975 | 0.9999994300000026 | 0.0000001200000028 |
| 0.6666677799999974 | 0.3333343500000012 | 0.3385472499999977 |
| 0.3333321799999993 | 0.6666665600000030 | 0.6614525900000032 |
| 0.9999998699999963 | 0.3570133400000017 | 0.4999999899999992 |
| 0.3570136599999998 | 0.0000010799999970 | 0.5000000900000003 |
| 0.6429862299999982 | 0.6429876500000020 | 0.5000001200000028 |
| 0.2924003700000029 | 0.3326796300000012 | 0.8216557399999971 |
| 0.0402758099999971 | 0.7075945099999998 | 0.8216571000000030 |
| 0.6673135699999975 | 0.9597194600000023 | 0.8216601700000012 |
| 0.7075995800000001 | 0.0402792100000013 | 0.1783441600000018 |
| 0.3326869300000013 | 0.2924059799999981 | 0.1783397600000001 |
| 0.9597241267588089 | 0.6673188226465590 | 0.1768511303240405 |

Cs2Te3/icsd\_053245

1.0000000000000000

|                     |                     |                     |
|---------------------|---------------------|---------------------|
| -4.2403791080000000 | -6.0684056269999997 | 0.0000005940000000  |
| -4.2403791210000001 | 6.0684055920000004  | 0.0000005540000000  |
| 0.0000010780000000  | -0.0000000480000000 | -8.4713441910000000 |

Cs Te  
4 6

Direct

|                    |                    |                    |
|--------------------|--------------------|--------------------|
| 0.0870122199999983 | 0.9129877700000009 | 0.3691614800000025 |
| 0.9129877700000009 | 0.0870122199999983 | 0.8691614800000025 |
| 0.5810522299999974 | 0.4189477700000026 | 0.6536390300000008 |
| 0.4189477700000026 | 0.5810522299999974 | 0.1536390300000008 |
| 0.7763474899999991 | 0.2236525400000033 | 0.3002700600000026 |
| 0.2236525400000033 | 0.7763474899999991 | 0.8002700600000026 |
| 0.5762342800000013 | 0.9142265799999976 | 0.5079647199999968 |
| 0.0857734000000008 | 0.4237657099999979 | 0.5079647199999968 |
| 0.4237657099999979 | 0.0857734000000008 | 0.0079647199999968 |
| 0.9142265801453774 | 0.5762342801547182 | 0.0091451702065442 |

Cu103V1/icsd\_009414/

1.0000000000000000

|                     |                     |                     |
|---------------------|---------------------|---------------------|
| 5.3827720560000003  | -0.0864282090000000 | -0.5648428450000000 |
| 2.5805694280000000  | 4.8429372559999999  | -0.9976085380000000 |
| -3.2475272479999999 | 0.4766001270000000  | 2.8957599009999999  |

O Cu V

3 1 1  
Direct

|                    |                    |                    |
|--------------------|--------------------|--------------------|
| 0.2334105600000029 | 0.1850873699999980 | 0.2325753399999968 |
| 0.8923794800000024 | 0.8674652099999989 | 0.3303437799999998 |
| 0.5096774499999981 | 0.6328536500000013 | 0.2984062199999968 |
| 0.0566791700000024 | 0.5388485699999990 | 0.0567542000000003 |
| 0.3746898353766033 | 0.8981771084221384 | 0.0331009553841335 |

Cu2S4W1/icsd\_098909

1.000000000000000

|                     |                     |                    |
|---------------------|---------------------|--------------------|
| -5.4132132280000000 | -0.0000033210000000 | 0.0000055920000000 |
| -0.0000033270000000 | -5.4132146329999999 | 0.0000055910000000 |
| 2.7066031960000001  | 2.7066038930000000  | 5.0507596399999999 |

S Cu W

4 2 1

Direct

|                     |                     |                     |
|---------------------|---------------------|---------------------|
| 0.3683652100000003  | 0.3683651300000008  | 0.2588179800000034  |
| 0.8904518699999997  | 0.8904519499999992  | 0.2588180600000030  |
| 0.6316345400000003  | 0.1095484200000030  | 0.7411821099999969  |
| 0.1095485100000033  | 0.6316346199999998  | 0.7411821099999969  |
| 0.9999998899999980  | 0.4999999500000030  | 0.9999998400000010  |
| 0.4999999500000030  | 0.9999998899999980  | 0.9999998400000010  |
| -0.0009899171433763 | -0.0009899171424624 | -0.0019798380039034 |

F2N1P1/icsd\_009684

1.000000000000000

|                     |                     |                     |
|---------------------|---------------------|---------------------|
| 0.0000000910000000  | -0.0000003430000000 | 4.9949402909999998  |
| 4.1995415960000004  | 2.5770768010000000  | -0.0000000890000000 |
| -4.1995424210000003 | 2.5770780860000002  | -0.0000002810000000 |

P F N

2 4 2

Direct

|                    |                    |                    |
|--------------------|--------------------|--------------------|
| 0.5047587099999973 | 0.8555101000000036 | 0.8555101399999998 |
| 0.0047586800000019 | 0.1444896300000025 | 0.1444895899999992 |
| 0.5685395200000016 | 0.8084527500000007 | 0.5261633499999974 |
| 0.5685395300000025 | 0.5261631699999967 | 0.8084527099999974 |
| 0.0685395100000008 | 0.1915472499999993 | 0.4738366899999988 |
| 0.0685395000000000 | 0.4738368599999987 | 0.1915473000000034 |
| 0.6971624500000004 | 0.0930865999999995 | 0.0930865999999995 |
| 0.1951600640662720 | 0.9069136298884581 | 0.9069136198450752 |

F3Rh1/icsd\_029134

1.000000000000000

|                     |                     |                     |
|---------------------|---------------------|---------------------|
| 4.9727899139999998  | -0.0000056420000000 | -0.0000367410000000 |
| -2.4863998359999999 | 4.3065593260000004  | -0.0000027030000000 |
| 0.0000648970000000  | 0.0000321000000000  | 7.3085444749999997  |

Rh F

3 9

Direct

|                    |                    |                    |
|--------------------|--------------------|--------------------|
| 0.9999998199999993 | 0.9999996600000003 | 0.9999999200000005 |
| 0.6666669399999989 | 0.3333336099999968 | 0.3397950800000018 |
| 0.3333331299999998 | 0.6666670299999993 | 0.6602057099999996 |
| 0.9999996600000003 | 0.3456518300000013 | 0.4999999200000005 |
| 0.3456518400000022 | 0.0000001900000015 | 0.5000002399999985 |
| 0.6543482200000028 | 0.6543484800000030 | 0.4999998400000010 |
| 0.2991337599999966 | 0.3331362799999980 | 0.8218496300000027 |
| 0.0340007000000000 | 0.7008651599999993 | 0.8218495099999998 |
| 0.6668627600000008 | 0.9659981699999989 | 0.8218507799999983 |
| 0.7008662900000004 | 0.0340010899999967 | 0.1781505900000013 |
| 0.3331375100000002 | 0.2991345499999980 | 0.1781492100000008 |
| 0.9659993929557489 | 0.6668639601987039 | 0.1767813085037035 |

F5K1Sn2/icsd\_036452

1.000000000000000

|                     |                     |                     |
|---------------------|---------------------|---------------------|
| 7.2338439470000004  | -0.0000051240000000 | -0.0000019190000000 |
| -3.6169264090000000 | 6.2646881600000004  | -0.0000008820000000 |
| -0.0000023210000000 | -0.0000028060000000 | 9.5876383529999991  |

K Sn F

3 6 15

Direct

|                    |                    |                    |
|--------------------|--------------------|--------------------|
| 0.0000055399999965 | 0.0000030699999982 | 0.3225689799999998 |
| 0.3333391899999967 | 0.6666700500000005 | 0.3411501900000005 |
| 0.6666720899999987 | 0.3333362899999983 | 0.3848031300000017 |
| 0.6679468499999999 | 0.6821588299999988 | 0.6742141499999974 |
| 0.0142203500000022 | 0.3320621599999996 | 0.6742140799999987 |
| 0.3178498300000001 | 0.9857880100000003 | 0.6742141000000004 |
| 0.3368094100000008 | 0.3432365099999970 | 0.0033400399999977 |
| 0.0064357600000022 | 0.6631990099999996 | 0.0033400299999968 |
| 0.6567719199999971 | 0.9935715100000024 | 0.0033392699999979 |
| 0.3333384600000002 | 0.6666687499999995 | 0.0346999799999992 |
| 0.3333389599999990 | 0.6666695400000009 | 0.6294032799999982 |
| 0.0000057000000027 | 0.0000030100000004 | 0.6322746700000010 |
| 0.4366044399999964 | 0.3340399900000008 | 0.6311190500000023 |
| 0.8974442499999995 | 0.5634046699999971 | 0.6311189999999982 |
| 0.6659683900000033 | 0.1025641000000022 | 0.6311188299999984 |
| 0.7646948000000009 | 0.7772511800000004 | 0.0548370899999995 |
| 0.0125651999999974 | 0.2353123800000034 | 0.0548355800000024 |
| 0.2227564100000023 | 0.9874430200000006 | 0.0548366499999986 |
| 0.3850361800000002 | 0.3622473799999995 | 0.2139063099999987 |

|                    |                    |                    |
|--------------------|--------------------|--------------------|
| 0.9772187100000025 | 0.6149707599999985 | 0.2139061000000027 |
| 0.6377613800000006 | 0.0227908299999982 | 0.2139052400000026 |
| 0.0243228100000010 | 0.3272919200000004 | 0.4602513900000034 |
| 0.3029769400000006 | 0.9756854199999978 | 0.4602513900000034 |
| 0.6727164294317620 | 0.6970316095328312 | 0.4592084602793793 |

Ga1In1S3/icsd\_062340

1.0000000000000000

|                     |                     |                     |
|---------------------|---------------------|---------------------|
| -0.0000768580000000 | 0.0000000110000000  | -3.7833525849999998 |
| 0.0000000220000000  | 6.1877539890000000  | -0.0000000070000000 |
| 9.6133891919999996  | -0.0000000050000000 | 1.8918660089999999  |

|   |    |    |
|---|----|----|
| S | Ga | In |
| 6 | 2  | 2  |

Direct

|                    |                    |                    |
|--------------------|--------------------|--------------------|
| 0.7795912599999966 | 0.7430321699999993 | 0.5590705099999980 |
| 0.2204087499999972 | 0.2430321800000002 | 0.4409294900000020 |
| 0.4366817399999974 | 0.7083713199999977 | 0.8733567499999992 |
| 0.5633182600000026 | 0.2083713299999985 | 0.1266432500000008 |
| 0.1006963499999998 | 0.6953240699999981 | 0.2014350399999998 |
| 0.8993036399999994 | 0.1953240500000035 | 0.7985649499999994 |
| 0.8857641199999975 | 0.5566474199999973 | 0.7715377000000032 |
| 0.1142358800000025 | 0.0566474399999990 | 0.2284623099999976 |
| 0.3341976800000026 | 0.0025249999999986 | 0.6683504399999975 |
| 0.6684454889233148 | 0.5025250199953015 | 0.3316495811318502 |

Ga1Se1/icsd\_073387

1.0000000000000000

|                     |                     |                     |
|---------------------|---------------------|---------------------|
| 3.7859205349999998  | -0.0000021200000000 | 0.0000000400000000  |
| -1.8929621000000001 | 3.2786969419999998  | 0.0000000430000000  |
| 0.0000001830000000  | 0.0000003110000000  | 16.0361514679999999 |

|    |    |
|----|----|
| Se | Ga |
| 4  | 4  |

Direct

|                    |                    |                    |
|--------------------|--------------------|--------------------|
| 0.6666820200000032 | 0.3333635500000014 | 0.8500308400000023 |
| 0.6666817899999984 | 0.3333633199999966 | 0.1499691599999977 |
| 0.3333347700000004 | 0.6666693600000002 | 0.3499677599999984 |
| 0.3333345300000019 | 0.6666691300000025 | 0.6500322400000016 |
| 0.0000156899999979 | 0.0000313000000034 | 0.9236530399999978 |
| 0.0000154499999994 | 0.0000310699999986 | 0.0763469600000022 |
| 0.6666680100000022 | 0.3333362600000029 | 0.4236602800000000 |
| 0.6666677500597199 | 0.3333360000591533 | 0.5757161289831682 |

Ga2Se2Te1/icsd\_064617

1.0000000000000000

|                     |                     |                     |
|---------------------|---------------------|---------------------|
| -7.3138207739999999 | -0.0000062240000000 | -0.0000073530000000 |
| -0.0000062260000000 | -7.3138207760000000 | -0.0000073390000000 |
| 3.6569183879999998  | 3.6569183949999999  | 5.3543720730000004  |

| Te | Se | Ga |
|----|----|----|
| 2  | 4  | 4  |

Direct

|                    |                    |                    |
|--------------------|--------------------|--------------------|
| 0.2725380400000006 | 0.7725378499999991 | 0.5450762700000027 |
| 0.0225378499999991 | 0.0225380400000006 | 0.0450762700000027 |
| 0.6556980699999997 | 0.4032571799999971 | 0.8065149000000034 |
| 0.1508167100000009 | 0.4032575800000018 | 0.8065143800000030 |
| 0.6532575800000018 | 0.9008167100000009 | 0.3065143800000030 |
| 0.6532571799999971 | 0.4056980699999997 | 0.3065149000000034 |
| 0.4501195200000012 | 0.1759737900000005 | 0.3519474499999973 |
| 0.9018277999999995 | 0.1759734700000024 | 0.3519470000000027 |
| 0.4259734700000024 | 0.6518277999999995 | 0.8519470000000027 |
| 0.4250399711553431 | 0.1991857011535564 | 0.8500798148070503 |

Ge1Hf1Te4/icsd\_241122

1.0000000000000000

|                     |                     |                      |
|---------------------|---------------------|----------------------|
| 3.9907710229700002  | 0.0000294052914565  | 0.0000000000000000   |
| -1.9954445134200001 | -7.9916886574900001 | 0.0000000000000000   |
| 0.0000000000000000  | 0.0000000000000000  | -11.0110803399999995 |

| Ge | Te | Hf |
|----|----|----|
| 2  | 8  | 2  |

Direct

|                    |                    |                    |
|--------------------|--------------------|--------------------|
| 0.2284411300000002 | 0.4568920000000034 | 0.9603063799999987 |
| 0.7715588699999998 | 0.5431079999999966 | 0.4603063799999987 |
| 0.0164016000000018 | 0.0328335999999965 | 0.2409680600000002 |
| 0.9835984099999990 | 0.9671664000000035 | 0.7409680600000002 |
| 0.1018489100000011 | 0.2036730299999974 | 0.4613893000000004 |
| 0.8981510899999989 | 0.7963269700000026 | 0.9613893000000004 |
| 0.2783833499999986 | 0.5567524900000009 | 0.1981534999999965 |
| 0.7216166500000014 | 0.4432475099999991 | 0.6981535000000036 |
| 0.3822096000000030 | 0.7643947500000010 | 0.4997565899999969 |
| 0.6177903999999970 | 0.2356052499999990 | 0.9997565899999969 |
| 0.6516651999999965 | 0.3033243599999977 | 0.2715861699999991 |
| 0.3483348000000036 | 0.6966756400000024 | 0.7724943461000020 |

Ge103Zn1/icsd\_183725

1.0000000000000000

|                    |                     |                     |
|--------------------|---------------------|---------------------|
| 5.0650474159999996 | -0.0000017180000000 | -0.0000023070000000 |
| 2.5325251980000001 | -4.3864588790000001 | -0.0000023140000000 |
| 2.5325261299999999 | -1.4621546510000001 | -4.3789303989999997 |

| Ge | Zn |   |
|----|----|---|
| 2  | 2  | 6 |

Direct

|                    |                    |                    |
|--------------------|--------------------|--------------------|
| 0.4990056299999992 | 0.4990056400000000 | 0.5029830300000029 |
| 0.9990056400000000 | 0.9990056299999992 | 0.0029830300000029 |
| 0.7235180400000019 | 0.7235176000000010 | 0.8294465199999976 |
| 0.2235176000000010 | 0.2235180400000019 | 0.3294465199999976 |
| 0.8730023199999977 | 0.2726848499999974 | 0.2199233099999987 |
| 0.6343893299999976 | 0.8730023999999972 | 0.2199235000000002 |
| 0.2726847599999971 | 0.6343894399999996 | 0.2199236299999967 |
| 0.3730023999999972 | 0.1343893199999968 | 0.7199235000000002 |
| 0.7726848499999974 | 0.3730023199999977 | 0.7199233099999987 |
| 0.1336282182567380 | 0.7719235282512169 | 0.7222072934991673 |

Ge1Te1/icsd\_655497

1.0000000000000000

|                     |                     |                    |
|---------------------|---------------------|--------------------|
| -4.2049041459999996 | -0.0000030380000000 | 0.0000057920000000 |
| -2.1024547020000002 | -3.6415522810000001 | 0.0000057940000000 |
| -2.1024579200000000 | -1.2138546480000001 | 3.5788789890000001 |

Ge    Te  
1       1

Direct

|                    |                    |                    |
|--------------------|--------------------|--------------------|
| 0.7641221299999970 | 0.7641221299999970 | 0.7076295800000025 |
| 0.2368092635492828 | 0.2368092635552496 | 0.2895762459522407 |

Ge1Te4Zr1/icsd\_240906

1.0000000000000000

|                     |                     |                      |
|---------------------|---------------------|----------------------|
| 3.9999928643499998  | 0.0000364673992896  | 0.0000000000000000   |
| -2.0000694470800000 | -8.0113241096699994 | 0.0000000000000000   |
| 0.0000000000000000  | 0.0000000000000000  | -11.0530160900999999 |

Ge    Te    Zr  
2       8       2

Direct

|                    |                    |                    |
|--------------------|--------------------|--------------------|
| 0.2285612000000015 | 0.4571372199999999 | 0.5368348299999965 |
| 0.7714387999999985 | 0.5428627800000001 | 0.0368348299999965 |
| 0.9848042100000001 | 0.9695803999999981 | 0.7576049600000019 |
| 0.0151957799999991 | 0.0304196000000019 | 0.2576049600000019 |
| 0.8996159900000009 | 0.7992547500000029 | 0.5380728000000019 |
| 0.1003840099999991 | 0.2007452499999971 | 0.0380728000000019 |
| 0.7202712699999978 | 0.4405625300000011 | 0.8011315299999993 |
| 0.2797287300000022 | 0.5594374699999989 | 0.3011315299999993 |
| 0.3821313600000025 | 0.7642330099999981 | 0.0003249100000033 |
| 0.6178686399999975 | 0.2357669900000019 | 0.5003249000000025 |
| 0.3486735999999979 | 0.6973567499999973 | 0.7270309800000021 |
| 0.6513263900000013 | 0.3026432500000027 | 0.2279357104300027 |

Hg2P2S7/icsd\_002490



1.0000000000000000  
0.0000005200000000 -5.8623403170000001 -0.0000000240000000  
5.4914718630000001 2.9311696750000000 0.0401622740000000  
-1.9031576130000001 0.0000002050000000 7.8731816300000004

P S Hg  
2 7 2

Direct

|                    |                    |                    |
|--------------------|--------------------|--------------------|
| 0.0856147100000015 | 0.1765925099999990 | 0.7055846399999979 |
| 0.9090221900000017 | 0.8234075000000018 | 0.2944153600000021 |
| 0.3710962600000016 | 0.4869799499999985 | 0.6414278900000028 |
| 0.8841163100000031 | 0.5130199899999965 | 0.3585720900000027 |
| 0.7766741200000027 | 0.0000000300000025 | 0.5000000100000008 |
| 0.8744044700000018 | 0.2489180099999970 | 0.8933789299999972 |
| 0.6254864300000023 | 0.7510820500000008 | 0.1066210899999973 |
| 0.2161308700000006 | 0.9493949399999977 | 0.7611403300000035 |
| 0.2667358500000034 | 0.0506049800000028 | 0.2388596799999974 |
| 0.7922394300000022 | 0.5813601600000027 | 0.8028355800000000 |
| 0.2106596656688176 | 0.4182004813538280 | 0.1958965069392324 |

Hg306S1/icsd\_024147

1.0000000000000000  
7.1607207040000000 -0.0000095820000000 0.0000085710000000  
-3.5803686500000000 6.2013625990000003 -0.0000066320000000  
0.0000117480000000 -0.0000039030000000 10.0419000109999992

S Hg 0  
3 9 18

Direct

|                    |                    |                    |
|--------------------|--------------------|--------------------|
| 0.2293644299999968 | 0.0000020199999966 | 0.3333397899999966 |
| 0.7706386300000005 | 0.7706358200000025 | 0.0000062499999984 |
| 0.9999966800000024 | 0.2293617400000016 | 0.6666725600000021 |
| 0.5070434000000006 | 0.1914213800000013 | 0.6877637699999966 |
| 0.6843784100000008 | 0.4929574100000025 | 0.3544305100000003 |
| 0.8085786299999995 | 0.3156214700000035 | 0.0210972599999977 |
| 0.4929582999999980 | 0.6843785699999998 | 0.6455837199999976 |
| 0.1914206800000002 | 0.5070424199999977 | 0.3122502800000007 |
| 0.3156211700000000 | 0.8085795200000021 | 0.9789169200000032 |
| 0.7052497500000001 | 0.9999997500000006 | 0.3333391800000030 |
| 0.2947497700000028 | 0.2947505300000017 | 0.0000066899999993 |
| 0.0000010500000016 | 0.7052503500000000 | 0.6666738899999984 |
| 0.3269475199999974 | 0.8464027799999982 | 0.7193277000000009 |
| 0.5194556800000001 | 0.6730534599999984 | 0.3859934600000017 |
| 0.1535976699999964 | 0.4805441600000009 | 0.0526599700000006 |
| 0.6730543199999985 | 0.5194553899999974 | 0.6140200500000006 |
| 0.8464015899999993 | 0.3269466699999981 | 0.2806860499999999 |
| 0.4805444699999981 | 0.1535991399999972 | 0.9473538000000019 |
| 0.8393571699999995 | 0.0311350799999985 | 0.5936673300000024 |
| 0.1917706999999993 | 0.1606382800000006 | 0.2603373199999979 |
| 0.9688665600000022 | 0.8082268200000016 | 0.9270013900000009 |
| 0.1606210799999985 | 0.1917450799999969 | 0.7396740200000025 |

|                    |                    |                    |
|--------------------|--------------------|--------------------|
| 0.0311264899999983 | 0.8393741300000030 | 0.4063440700000029 |
| 0.8082532800000024 | 0.9688753599999984 | 0.0730097499999971 |
| 0.1133880800000000 | 0.4101776899999976 | 0.5667349599999980 |
| 0.2967887000000005 | 0.8866132499999964 | 0.2333999100000028 |
| 0.5898234900000006 | 0.7032115499999989 | 0.9000681799999981 |
| 0.8866222699999966 | 0.2967997299999965 | 0.7666146999999981 |
| 0.4101798000000016 | 0.1133787999999996 | 0.4332797300000024 |
| 0.7032002313203963 | 0.5898216093732517 | 0.0989509725182403 |

I2Pb1/icsd\_024263

1.000000000000000

|                     |                     |                     |
|---------------------|---------------------|---------------------|
| 4.5532946379999997  | -0.0000004450000000 | 0.0000000020000000  |
| -2.2766477020000000 | 3.9432304189999998  | -0.0000000020000000 |
| -0.0000000040000000 | 0.0000000070000000  | 14.1180142180000008 |

Pb I  
2 4

Direct

|                    |                    |                    |
|--------------------|--------------------|--------------------|
| 0.6666676700000025 | 0.3333353399999979 | 0.4999891499999976 |
| 0.3333323299999975 | 0.6666646600000021 | 0.9999891499999976 |
| 0.0000033600000009 | 0.0000068200000030 | 0.6348742300000012 |
| 0.9999966399999991 | 0.9999931799999970 | 0.1348742400000020 |
| 0.3333336999999972 | 0.6666673400000036 | 0.3651366100000004 |
| 0.6666663000000091 | 0.3333326600012609 | 0.8644282950878898 |

I3Na108/icsd\_418336

1.000000000000000

|                     |                     |                     |
|---------------------|---------------------|---------------------|
| 7.9445366420000001  | -0.0000006930000000 | -0.0000001390000000 |
| -0.0000005710000000 | 7.9445378289999997  | -0.0000001050000000 |
| -0.0000001290000000 | -0.0000001520000000 | 5.6860469309999999  |

I Na 0  
6 2 16

Direct

|                    |                    |                    |
|--------------------|--------------------|--------------------|
| 0.7352495000000019 | 0.2469455000000025 | 0.0979823400000015 |
| 0.2647504899999973 | 0.7530545099999983 | 0.0979823400000015 |
| 0.7530539799999971 | 0.7352497500000013 | 0.9020181100000002 |
| 0.2469460399999974 | 0.2647502499999987 | 0.9020180999999994 |
| 0.0000000200000017 | 0.5000000100000008 | 0.4200418900000003 |
| 0.4999999899999992 | 0.0000000000000000 | 0.5799578199999971 |
| 0.4999999699999975 | 0.4999999799999983 | 0.4999999799999983 |
| 0.0000000100000008 | 0.9999999799999983 | 0.4999999899999992 |
| 0.7634545499999987 | 0.4008424700000006 | 0.3721975599999965 |
| 0.2365454600000021 | 0.5991575500000010 | 0.3721975400000019 |
| 0.5991575700000027 | 0.7634544900000009 | 0.6278025000000014 |
| 0.4008424299999973 | 0.2365454799999966 | 0.6278025000000014 |
| 0.7662690299999966 | 0.0529374300000001 | 0.2689726899999982 |
| 0.2337309600000026 | 0.9470625800000008 | 0.2689726500000020 |
| 0.9470629599999967 | 0.7662690499999982 | 0.7310269199999979 |
| 0.0529370300000025 | 0.2337309500000018 | 0.7310269000000034 |
| 0.5082682999999975 | 0.2696499899999978 | 0.1484517499999995 |

|                    |                    |                    |
|--------------------|--------------------|--------------------|
| 0.4917317199999971 | 0.7303500299999968 | 0.1484517499999995 |
| 0.7303500100000022 | 0.5082680599999989 | 0.8515482000000034 |
| 0.2696499899999978 | 0.4917319300000003 | 0.8515481800000018 |
| 0.9411870699999980 | 0.6750626700000026 | 0.2142574699999997 |
| 0.0588129300000020 | 0.3249373399999982 | 0.2142574599999989 |
| 0.3249372300000033 | 0.9411870100000002 | 0.7857426500000031 |
| 0.6750627699714399 | 0.0588129799663506 | 0.7839839889231660 |

# I7Nb3Te1/icsd\_086724

1.000000000000000

|                     |                    |                    |
|---------------------|--------------------|--------------------|
| 7.6556141489999998  | 0.0000270730000000 | 0.0000125350000000 |
| -3.8277835450000000 | 6.6299392690000003 | 0.0000023310000000 |
| 0.0000115970000000  | 0.0000091380000000 | 6.9015375340000000 |

|   |    |    |
|---|----|----|
| I | Nb | Te |
| 7 | 3  | 1  |

Direct

|                    |                    |                    |
|--------------------|--------------------|--------------------|
| 0.6666592899999984 | 0.3333295400000011 | 0.7133524799999975 |
| 0.6606796599999996 | 0.8303399699999972 | 0.7660565300000002 |
| 0.1696482300000000 | 0.3393090100000009 | 0.7660558600000016 |
| 0.1696483999999998 | 0.8303394400000030 | 0.7660559500000019 |
| 0.0030446499999996 | 0.5015220599999992 | 0.2745674100000031 |
| 0.4984719500000026 | 0.9969493899999975 | 0.2745669500000005 |
| 0.4984716599999999 | 0.5015222600000016 | 0.2745670300000000 |
| 0.2653136899999993 | 0.1326570100000026 | 0.4990108300000031 |
| 0.8673332600000023 | 0.7346768600000004 | 0.4990114900000009 |
| 0.8673333799999980 | 0.1326566500000013 | 0.4990119200000009 |
| 0.9999958431934503 | 0.9999978119970648 | 0.1958945975092275 |

# In1Se1/icsd\_041477

1.000000000000000

|                    |                     |                     |
|--------------------|---------------------|---------------------|
| 4.0450470420000002 | 0.0008499600000000  | -0.0060852550000000 |
| 2.0217874409999999 | -3.5035385200000002 | -0.0060853120000000 |
| 2.0348583840000001 | -1.1748261550000001 | -8.4118099950000005 |

|    |    |
|----|----|
| Se | In |
| 2  | 2  |

Direct

|                    |                    |                    |
|--------------------|--------------------|--------------------|
| 0.8307037000000008 | 0.8307037200000025 | 0.5112558300000032 |
| 0.6146324899999982 | 0.6146324600000028 | 0.1523372999999992 |
| 0.0000649300000006 | 0.0000649199999998 | 0.9982545299999970 |
| 0.1118999530511016 | 0.1118999729969088 | 0.6662417219728998 |

# In2S4Zn1/icsd\_016200

1.000000000000000

|                     |                     |                     |
|---------------------|---------------------|---------------------|
| 3.8945872680000000  | -0.0000009420000000 | -0.0000000570000000 |
| -1.9472944470000000 | 3.3728189359999998  | -0.0000000680000000 |
| -0.0000004500000000 | -0.0000007260000000 | 24.5824776249999992 |

|    |   |    |
|----|---|----|
| Zn | S | In |
| 2  | 8 | 4  |

Direct

|                    |                    |                    |
|--------------------|--------------------|--------------------|
| 0.9999877699999971 | 0.9999747000000028 | 0.9128168399999979 |
| 0.0000123800000011 | 0.0000254500000025 | 0.4128168200000033 |
| 0.0000134599999981 | 0.0000272799999976 | 0.5498962400000025 |
| 0.9999863700000020 | 0.9999725400000017 | 0.0498962300000017 |
| 0.6666667699999991 | 0.3333335999999998 | 0.6940991299999979 |
| 0.3333331299999998 | 0.6666663399999990 | 0.1940991199999971 |
| 0.9999969899999996 | 0.9999936600000012 | 0.8081220500000015 |
| 0.0000030899999999 | 0.0000064199999983 | 0.3081220299999998 |
| 0.3333209600000018 | 0.6666412499999979 | 0.9350313899999989 |
| 0.6666792099999981 | 0.3333589200000020 | 0.4350313699999973 |
| 0.3333304200000029 | 0.6666607200000030 | 0.7565220099999976 |
| 0.6666695899999979 | 0.3333392799999970 | 0.2565219900000031 |
| 0.6666808800000013 | 0.3333619100000007 | 0.5940123999999969 |
| 0.3333189899092179 | 0.6666379599124402 | 0.0936055861791130 |

In2Te5/icsd\_000501

1.0000000000000000

|                     |                     |                     |
|---------------------|---------------------|---------------------|
| -4.3385048810000004 | 0.0002627450000000  | -0.0613908440000000 |
| -2.1687533790000000 | -8.2532564229999998 | -0.0306856860000000 |
| -0.1927795880000000 | 0.0000180000000000  | 13.5336418359999993 |

|    |    |
|----|----|
| Te | In |
| 10 | 4  |

Direct

|                    |                    |                    |
|--------------------|--------------------|--------------------|
| 0.9876171299999967 | 0.0165546699999979 | 0.8559852799999987 |
| 0.0043114400000022 | 0.9834452099999993 | 0.3559854599999994 |
| 0.3919994299999985 | 0.2082484700000009 | 0.5982079099999993 |
| 0.6001405800000015 | 0.7917516400000011 | 0.0982078099999981 |
| 0.6897607200000024 | 0.6123589899999970 | 0.7323430100000010 |
| 0.3021719700000034 | 0.3876411500000003 | 0.2323427800000033 |
| 0.2226549100000028 | 0.5466318599999980 | 0.8859965299999999 |
| 0.7693297499999971 | 0.4533684299999976 | 0.3859963199999967 |
| 0.1594158500000020 | 0.6733447200000029 | 0.5764364999999998 |
| 0.8327286999999970 | 0.3266547899999992 | 0.0764362500000004 |
| 0.9999488999999997 | 0.9922386200000020 | 0.6411540799999997 |
| 0.9921803499999982 | 0.0077613699999972 | 0.1411543500000008 |
| 0.3798540599999995 | 0.2321848799999984 | 0.8125769800000029 |
| 0.6121190463423234 | 0.7678152194338561 | 0.3118379894920653 |

Li706Sb1/icsd\_015631

1.0000000000000000

|                    |                     |                     |
|--------------------|---------------------|---------------------|
| 5.5902495569999999 | 0.0000036160000000  | 0.0000030400000000  |
| 2.7951216390000000 | -4.8412962979999996 | 0.0000026160000000  |
| 2.7951208740000002 | -1.6137629540000000 | -4.8765070140000004 |

|    |   |    |
|----|---|----|
| Sb | 0 | Li |
| 1  | 6 | 7  |

Direct

|                    |                    |                    |
|--------------------|--------------------|--------------------|
| 0.0012519300000022 | 0.0012517999999986 | 0.9962448100000003 |
| 0.7981185399999973 | 0.3769033900000025 | 0.7495767799999982 |
| 0.0754025499999997 | 0.7981184100000007 | 0.7495761999999999 |
| 0.3769039800000016 | 0.0754008099999979 | 0.7495773099999994 |

|                    |                    |                    |
|--------------------|--------------------|--------------------|
| 0.6425400600000017 | 0.8828403600000030 | 0.2409383600000012 |
| 0.2336820700000004 | 0.6425401899999983 | 0.2409389700000020 |
| 0.8828401299999982 | 0.2336824300000018 | 0.2409381699999997 |
| 0.9362700399999966 | 0.4865092799999999 | 0.3410825300000013 |
| 0.2361393799999973 | 0.9362718699999988 | 0.3410821599999991 |
| 0.4865104100000011 | 0.2361384700000002 | 0.3410826799999995 |
| 0.1218866999999975 | 0.4983916400000012 | 0.6555076599999978 |
| 0.7242142899999990 | 0.1218854800000031 | 0.6555064300000026 |
| 0.4983904799999976 | 0.7242136599999967 | 0.6555067800000032 |
| 0.6551658916655744 | 0.6551686614262154 | 0.0344918273394045 |

Mo108V2/icsd\_025378

1.0000000000000000

|                     |                     |                     |
|---------------------|---------------------|---------------------|
| 0.0001423020000000  | 3.7159048100000001  | 0.0143135040000000  |
| 0.0000217350000000  | -0.0156619740000000 | -4.0133604380000003 |
| -9.6361186320000005 | -1.8583296800000000 | -0.0071054060000000 |

Mo     0     V  
1       8     2

Direct

|                    |                    |                    |
|--------------------|--------------------|--------------------|
| 0.9454916500000010 | 0.0121230199999971 | 0.9999971900000020 |
| 0.4739297899999997 | 0.9257851400000021 | 0.0000022199999989 |
| 0.9612918400000012 | 0.4459291599999986 | 0.9999918199999982 |
| 0.8315033100000022 | 0.4418152300000031 | 0.6246041400000024 |
| 0.2067694300000014 | 0.4418261499999971 | 0.3754048300000008 |
| 0.9101178199999964 | 0.9453481700000026 | 0.8046374700000030 |
| 0.1054757799999990 | 0.9454009000000028 | 0.1953597400000007 |
| 0.3068930299999977 | 0.9589442400000010 | 0.5823266100000026 |
| 0.7245139400000014 | 0.9589345799999975 | 0.4176708299999987 |
| 0.8287765099999973 | 0.0354404699999975 | 0.6233051600000010 |
| 0.2052473950882112 | 0.0379446549800193 | 0.376699957753863  |

Mo1S2/icsd\_038401

1.0000000000000000

|                    |                     |                     |
|--------------------|---------------------|---------------------|
| 3.1756176090000001 | -0.0000047110000000 | 0.0000205440000000  |
| 1.5878128860000000 | -2.7501631600000001 | 0.0000205450000000  |
| 1.5877704950000000 | -0.9166997160000000 | -6.1521195559999997 |

Mo     S  
1       2

Direct

|                    |                    |                    |
|--------------------|--------------------|--------------------|
| 0.9999902400000025 | 0.9999902400000025 | 0.0000331199999977 |
| 0.2482565199999982 | 0.2482565199999982 | 0.2552410500000022 |
| 0.4179114360558881 | 0.4179114360595954 | 0.7462512824390778 |

Mo1Se2/icsd\_016948

1.0000000000000000

|                    |                     |                     |
|--------------------|---------------------|---------------------|
| 3.3106495560000000 | -0.0000151930000000 | 0.0001036390000000  |
| 1.6553379380000000 | -2.8671062759999999 | 0.0000435970000000  |
| 1.6551311110000000 | -0.9557219860000000 | -6.5057366200000004 |

| Mo                   | Se                  |                     |
|----------------------|---------------------|---------------------|
| 1                    | 2                   |                     |
| Direct               |                     |                     |
| 0.3332166499999971   | 0.3331830799999977  | 0.0004235299999991  |
| 0.7525174499999991   | 0.7525222200000030  | 0.7424111500000024  |
| 0.5801536314754501   | 0.5800823275952354  | 0.2597024133616314  |
| N1Na1Sn1/icsd_172471 |                     |                     |
| 1.000000000000000    |                     |                     |
| 3.3458590060000000   | 0.0000001510000000  | 0.0000000080000000  |
| -1.6729293740000000  | 2.8975984659999998  | 0.0000000070000000  |
| 0.0000000080000000   | 0.0000000280000000  | 10.8627084840000006 |
| Na                   | Sn                  | N                   |
| 2                    | 2                   | 2                   |
| Direct               |                     |                     |
| 0.66667489000000030  | 0.3333496999999994  | 0.74460641000000029 |
| 0.33332510999999970  | 0.66665030000000006 | 0.24460641000000029 |
| 0.99999430999999982  | 0.99998870999999967 | 0.49981138999999979 |
| 0.00000569000000018  | 0.00001129999999970 | 0.99981139999999987 |
| 0.33332887000000026  | 0.66665781999999975 | 0.60022218999999967 |
| 0.6666711300066465   | 0.3333421800088981  | 0.0993016192797536  |
| N3Na1/icsd_029380    |                     |                     |
| 1.000000000000000    |                     |                     |
| 4.0820471539999996   | 2.6178398380000001  | -1.1627026250000001 |
| 3.7207790369999998   | -1.7848883510000000 | -0.9543061819999999 |
| 4.0491721880000000   | 0.5682048380000000  | -4.4395880329999997 |
| Na                   | N                   |                     |
| 1                    | 3                   |                     |
| Direct               |                     |                     |
| 0.87490714999999985  | 0.09144420999999988 | 0.01695784999999972 |
| 0.65816136000000011  | 0.24812084999999994 | 0.48424845000000026 |
| 0.87566666000000003  | 0.91383545000000005 | 0.60452175000000035 |
| 0.0896209713555245   | 0.2451423115628418  | 0.3972681643894688  |
| Na1P1Sn1/icsd_409010 |                     |                     |
| 1.000000000000000    |                     |                     |
| 3.9040004790000000   | 0.0000016340000000  | 0.0000000130000000  |
| -1.9519988180000001  | 3.3809382580000000  | 0.0000000150000000  |
| 0.0000000063000000   | 0.0000000920000000  | 11.5633507800000004 |
| Na                   | Sn                  | P                   |
| 2                    | 2                   | 2                   |
| Direct               |                     |                     |
| 0.66667678999999968  | 0.33335318999999969 | 0.7779896199999996  |
| 0.33332321999999969  | 0.66664681999999969 | 0.2779896199999996  |
| 0.99999342000000027  | 0.99998732000000025 | 0.49860573000000013 |
| 0.00000658999999981  | 0.00001267999999975 | 0.99860573000000013 |
| 0.66667237000000006  | 0.33334451999999971 | 0.11420464999999978 |
| 0.3333276200257203   | 0.6666554600235335  | 0.6133398487680490  |

01Sn1/icsd\_020624

1.000000000000000

|                     |                     |                    |
|---------------------|---------------------|--------------------|
| 3.3591187560000000  | -0.0000000020000000 | 0.0000001080000000 |
| 0.0000000030000000  | 3.8151272719999998  | 0.0000002360000000 |
| -0.0000000170000000 | -0.0000004650000000 | 5.8342209350000003 |

Sn 0

2 2

Direct

|                    |                     |                    |
|--------------------|---------------------|--------------------|
| 0.4999999899999992 | 0.96712981999999967 | 0.7316585000000018 |
| 0.0000000100000008 | 0.4671298000000021  | 0.2683414999999982 |
| 0.5000000100000008 | 0.7828701899999970  | 0.3833475200000009 |
| 0.9999999899913250 | 0.2828701997910871  | 0.6149384550922331 |

03Pb1Rb2/icsd\_001413

1.000000000000000

|                     |                     |                     |
|---------------------|---------------------|---------------------|
| -0.0000000030000000 | -0.0000008190000000 | 6.0890835630000000  |
| 5.4737957960000001  | 3.6848377260000000  | -0.0000004970000000 |
| -5.4737962070000004 | 3.6848381710000000  | -0.0000004960000000 |

Pb 0 Rb

2 6 4

Direct

|                    |                    |                    |
|--------------------|--------------------|--------------------|
| 0.7410959500000018 | 0.9047972199999990 | 0.9047972099999981 |
| 0.2410958099999974 | 0.0952030799999974 | 0.0952030899999983 |
| 0.5021017199999989 | 0.1545632300000008 | 0.8922370599999994 |
| 0.5021017199999989 | 0.8922370000000015 | 0.1545631700000030 |
| 0.0021016199999977 | 0.8454367499999975 | 0.1077628399999995 |
| 0.0021016199999977 | 0.1077628999999973 | 0.8454368000000017 |
| 0.6603425200000004 | 0.6341421999999994 | 0.6341421300000007 |
| 0.1603428199999968 | 0.3658574800000025 | 0.3658575500000012 |
| 0.7671790899999991 | 0.1931407800000002 | 0.5183895799999974 |
| 0.7671791100000007 | 0.5183895799999974 | 0.1931407800000002 |
| 0.2671789899999979 | 0.8068593400000026 | 0.4816104499999980 |
| 0.2655367367406993 | 0.4816104498170394 | 0.8068593398179442 |

05Sb2V1/icsd\_203130

1.000000000000000

|                     |                     |                     |
|---------------------|---------------------|---------------------|
| 17.8645877810000009 | -0.0000000350000000 | -0.0000000680000000 |
| 0.0000000070000000  | 4.7131958159999998  | -0.0000295390000000 |
| 0.0000000270000000  | 0.0000380100000000  | 5.4102689670000004  |

Sb 0 V

8 20 4

Direct

|                    |                    |                    |
|--------------------|--------------------|--------------------|
| 0.9105037499999966 | 0.0221154400000003 | 0.6782160200000007 |
| 0.5849421699999979 | 0.4935728100000034 | 0.1748804899999996 |
| 0.4150575600000010 | 0.9935711700000027 | 0.3251196100000016 |
| 0.0894964000000016 | 0.5221165999999968 | 0.8217846200000025 |
| 0.0849424399999990 | 0.9935711800000036 | 0.3251196100000016 |
| 0.4105035899999976 | 0.5221165900000031 | 0.8217846200000025 |
| 0.5894962500000034 | 0.0221154299999995 | 0.6782160200000007 |
| 0.9150578300000021 | 0.4935728100000034 | 0.1748804899999996 |

|                     |                    |                    |
|---------------------|--------------------|--------------------|
| 0.7500000000000000  | 0.6986134400000026 | 0.8354410800000025 |
| 0.7500000000000000  | 0.7858895000000032 | 0.3103834599999971 |
| 0.2500000000000000  | 0.2858902600000022 | 0.1896169199999989 |
| 0.2500000000000000  | 0.1986136900000020 | 0.6645593800000000 |
| 0.8204351700000032  | 0.2571933999999985 | 0.5540100500000023 |
| 0.6710683100000026  | 0.2281947700000018 | 0.0542354999999972 |
| 0.3289313200000024  | 0.7281959499999999 | 0.4457642100000001 |
| 0.1795653200000018  | 0.7571938500000002 | 0.9459900000000019 |
| 0.1710686799999976  | 0.7281959600000008 | 0.4457642100000001 |
| 0.3204346799999982  | 0.7571938500000002 | 0.9459900000000019 |
| 0.6795648299999968  | 0.2571933999999985 | 0.5540100500000023 |
| 0.8289316899999974  | 0.2281947800000026 | 0.0542354999999972 |
| 0.9590136999999999  | 0.3579512600000001 | 0.8487444599999989 |
| 0.5396474300000023  | 0.1570583000000028 | 0.3554277799999994 |
| 0.4603527299999968  | 0.6570576100000025 | 0.1445712900000018 |
| 0.0409860299999991  | 0.8579516499999968 | 0.6512553600000004 |
| 0.0396472700000032  | 0.6570576200000033 | 0.1445712900000018 |
| 0.4590139700000009  | 0.8579516400000031 | 0.6512553600000004 |
| 0.5409863000000001  | 0.3579512499999993 | 0.8487444599999989 |
| 0.9603525599999969  | 0.1570583099999965 | 0.3554277799999994 |
| 0.7500000000000000  | 0.3518143200000026 | 0.8255397000000002 |
| 0.7500000000000000  | 0.1315087099999985 | 0.2874696599999993 |
| 0.2500000000000000  | 0.6315096299999965 | 0.2125303999999986 |
| 0.25000000000027935 | 0.8518148249060832 | 0.6726122730576832 |

Pb1S1/icsd\_183255

1.0000000000000000

|                     |                     |                     |
|---------------------|---------------------|---------------------|
| 4.0972295689999996  | -0.0000008220000000 | -0.0000000210000000 |
| -2.0486154870000002 | 3.5482742439999999  | 0.0000001000000000  |
| -0.0000000240000000 | 0.0000001280000000  | 7.4002836150000002  |

Pb S  
2 2

Direct

|                    |                    |                    |
|--------------------|--------------------|--------------------|
| 0.0000006499999969 | 0.0000013300000035 | 0.4754708800000031 |
| 0.9999993500000031 | 0.9999986699999965 | 0.9754708800000031 |
| 0.3333317100000031 | 0.6666636200000013 | 0.7037291199999984 |
| 0.6666682900164549 | 0.3333363900487462 | 0.2023778204390289 |

S2Sn1/icsd\_043003

1.0000000000000000

|                     |                    |                     |
|---------------------|--------------------|---------------------|
| 3.6808035380000002  | 0.0000001180000000 | 0.0000000210000000  |
| -1.8404016620000001 | 3.1876702140000002 | 0.0000000240000000  |
| 0.0000000690000000  | 0.0000001250000000 | 11.7993693529999994 |

S Sn  
4 2

Direct

|                    |                    |                    |
|--------------------|--------------------|--------------------|
| 0.0000005400000020 | 0.0000010500000016 | 0.4992126799999994 |
| 0.9999994799999996 | 0.9999989700000000 | 0.9992126799999994 |
| 0.6666655900000009 | 0.3333311800000018 | 0.7507134800000017 |
| 0.3333343899999974 | 0.6666687999999965 | 0.2507134800000017 |



|                    |                    |                    |
|--------------------|--------------------|--------------------|
| 0.3333311299999977 | 0.6666622300000000 | 0.6250738399999989 |
| 0.6666688700325062 | 0.3333377700332336 | 0.1242263370783739 |

S2W1/icsd\_202367

1.0000000000000000

|                    |                    |                    |
|--------------------|--------------------|--------------------|
| 3.1759339980000001 | 0.0000006090000000 | 0.0000343460000000 |
|--------------------|--------------------|--------------------|

|                    |                     |                    |
|--------------------|---------------------|--------------------|
| 1.5879664689999999 | -2.7504398200000000 | 0.0000343590000000 |
|--------------------|---------------------|--------------------|

|                    |                     |                     |
|--------------------|---------------------|---------------------|
| 1.5878998120000001 | -0.9167743450000000 | -6.2027772719999996 |
|--------------------|---------------------|---------------------|

S      W

2      1

Direct

|                    |                    |                    |
|--------------------|--------------------|--------------------|
| 0.2492236499999976 | 0.2492236599999984 | 0.2523484700000012 |
|--------------------|--------------------|--------------------|

|                    |                    |                    |
|--------------------|--------------------|--------------------|
| 0.4188153200000002 | 0.4188153099999994 | 0.7435321299999984 |
|--------------------|--------------------|--------------------|

|                    |                    |                    |
|--------------------|--------------------|--------------------|
| 0.0001236609658800 | 0.0001236609983231 | 0.9996315751018182 |
|--------------------|--------------------|--------------------|
