# Supplementary material for: Large piezoelectric response of van der Waals layered solids
Source: Royal Society of Chemistry journal article supplement (doi:10.1039/c8tc02560f), 2018-01-01
Supplement: c8tc02560f1.zip [file c8tc02560f1.zip]

# Supplementary Information

## Large Piezoelectric Response of van der Waals Layered Solids

Sukriti Manna<sup>1,3</sup>, Prashun Gorai<sup>2,3</sup>, Geoff L. Brennecke<sup>2</sup>, Cristian V. Ciobanu<sup>1</sup>, and Vladan Stevanović<sup>2,3</sup> \*

<sup>1</sup>Dept. of Mechanical Eng., Colorado School of Mines, Golden, Colorado 80401, USA

<sup>2</sup>Dept. of Metallurgical and Materials Eng., Colorado School of Mines, Golden, Colorado 80401, USA

<sup>3</sup>National Renewable Energy Laboratory, Golden, CO 80401, USA

(Dated: August 14, 2018)

### A. Comparison of Experimental and Calculated Piezoelectric Modulus

Using density functional theory, we have calculated longitudinal piezoelectric modulus ( $d_{33}$ ) of well-known piezoelectric compounds. The predicted modulus are found to be in good agreement with experimentally measured values. Since, they are all exist in bulk 3D crystal, standard GGA-PBE exchange correlation functionals have been used for these calculations. Plane wave cutoff energy of 540 eV is used for structural relaxation, calculation of elastic tensors and piezoelectric coefficient tensor. k-point grid, defined by  $n_{\text{atoms}} \times n_{\text{kpoints}} \approx 1000$ , where  $n_{\text{atoms}}$  is number of atoms in the primitive cell and  $n_{\text{kpoints}}$  is the number of  $k$ -points, is used throughout the calculations. A very high tolerance of  $10^{-8}$  eV for energy convergence is used for all three calculations.

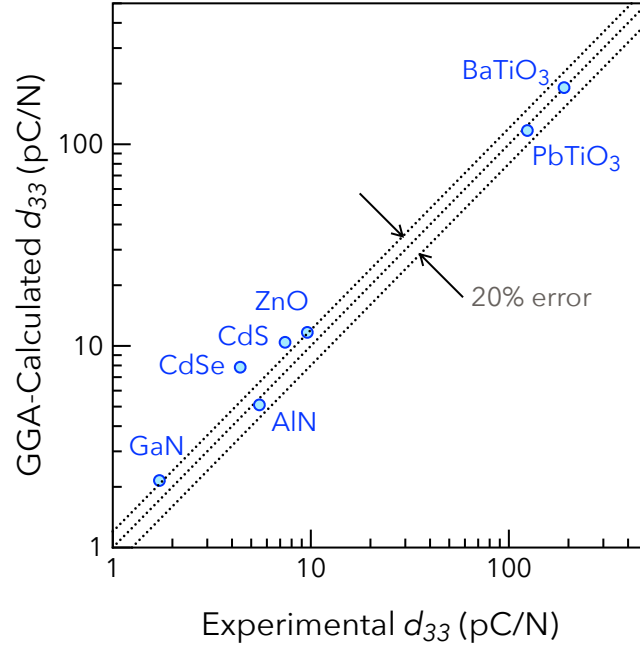

FIG. S1: Calculated  $d_{33}$  with GGA functional vs experimentally measured  $d_{33}$

\* Corresponding author, email: vstevano@mines.edu

### B. Axial Anisotropies: $\mathbf{C}$ vs $\mathbf{e}$

We have investigated all the possible correlations among the axial anisotropies of  $\mathbf{d}$ ,  $\mathbf{e}$ , and  $\mathbf{C}$ . In the main text, we have described the axial anisotropy dependence of  $\mathbf{d}$  on the axial anisotropies of  $\mathbf{C}$  and  $\mathbf{e}$ . The remaining plot between axial anisotropy of  $\mathbf{C}$  and  $\mathbf{e}$  is shown in Figure S2.

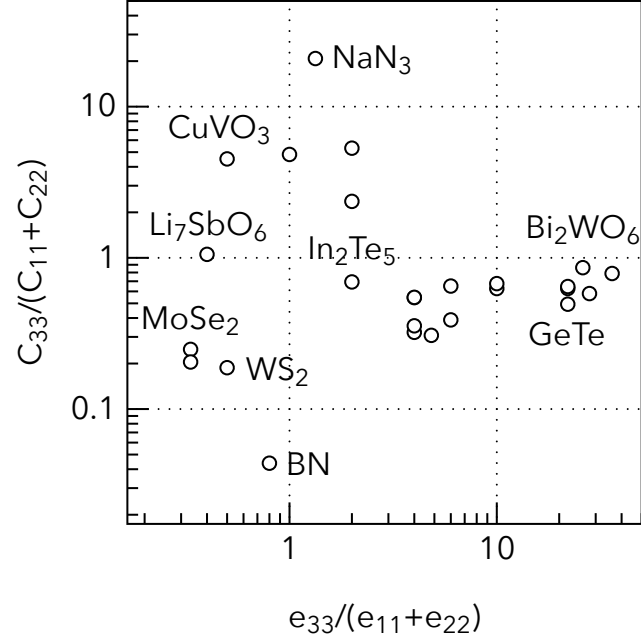

FIG. S2: Axial anisotropy in  $\mathbf{C}$  vs axial anisotropy in  $\mathbf{e}$

### C. Experimentally Measured Elastic Constants of Quasi-2D Materials

TABLE S1: Reference table for Figure 6. The measured values of  $C_{ij}$  are reported in GPa unit

| Material                            | SG  | $C_{11}$ | $C_{12}$ | $C_{33}$ | $C_{44}$ | Technique                        | Temperature |
|-------------------------------------|-----|----------|----------|----------|----------|----------------------------------|-------------|
| TiSe <sub>2</sub> [1]               | 164 | 120      | 42       | 39       | 14.3     | Neutron Inelastic Scattering     | 300K        |
| Bi <sub>2</sub> Te <sub>3</sub> [2] | 166 | 74       | -        | 52       | 31.35    | Wave Resonance Technique         | 4.2K        |
| GaSe[3]                             | 187 | 103      | 28.9     | 34.1     | 9        | Brillouin Scattering             | 300K        |
| InSe[3]                             | 194 | 73       | 27       | 36       | 11.7     | Brillouin Scattering             | 300K        |
| GaS[3]                              | 194 | 123.3    | 34.7     | 38.2     | 9.96     | Brillouin Scattering             | 300K        |
| PbI <sub>2</sub> [4]                | 166 | 27.7     | 9.6      | 20.2     | 6.2      | Neutron Inelastic Scattering     | 293K        |
| BiI <sub>3</sub> [5]                | 162 | 29       | 5        | 26       | 7        | Brillouin Scattering             | 83K         |
| NiTe <sub>2</sub> [6]               | 164 | 109.5    | 41.9     | 52.6     | 20.4     | Neutron Spectrometry             | 300K        |
| TaSe <sub>2</sub> [7]               | 194 | 229      | 36.6     | 54       | 18.5     | Neutron Spectrometry             | 300K        |
| NbSe <sub>2</sub> [7]               | 194 | 194      | 91       | 42       | 17.6     | Neutron Spectrometry             | 300K        |
| HgI <sub>2</sub> [8]                | 137 | 33       | 5.6      | 16.3     | 7.23     | Ultrasound Propagation Technique | 293K        |
| CdI <sub>2</sub> [9]                | 164 | 41.21    | 16       | 21.8     | 18.6     | Brillouin Scattering             | -           |
| SnS <sub>2</sub> [9]                | 164 | 124      | 33       | 28.9     | 10.2     | Brillouin Scattering             | -           |
| MoS <sub>2</sub> [10]               | 194 | 238      | -54      | 51       | 21.7     | Neutron Inelastic Scattering     | 308K        |

### D. Schematics of Different Modes of $d$

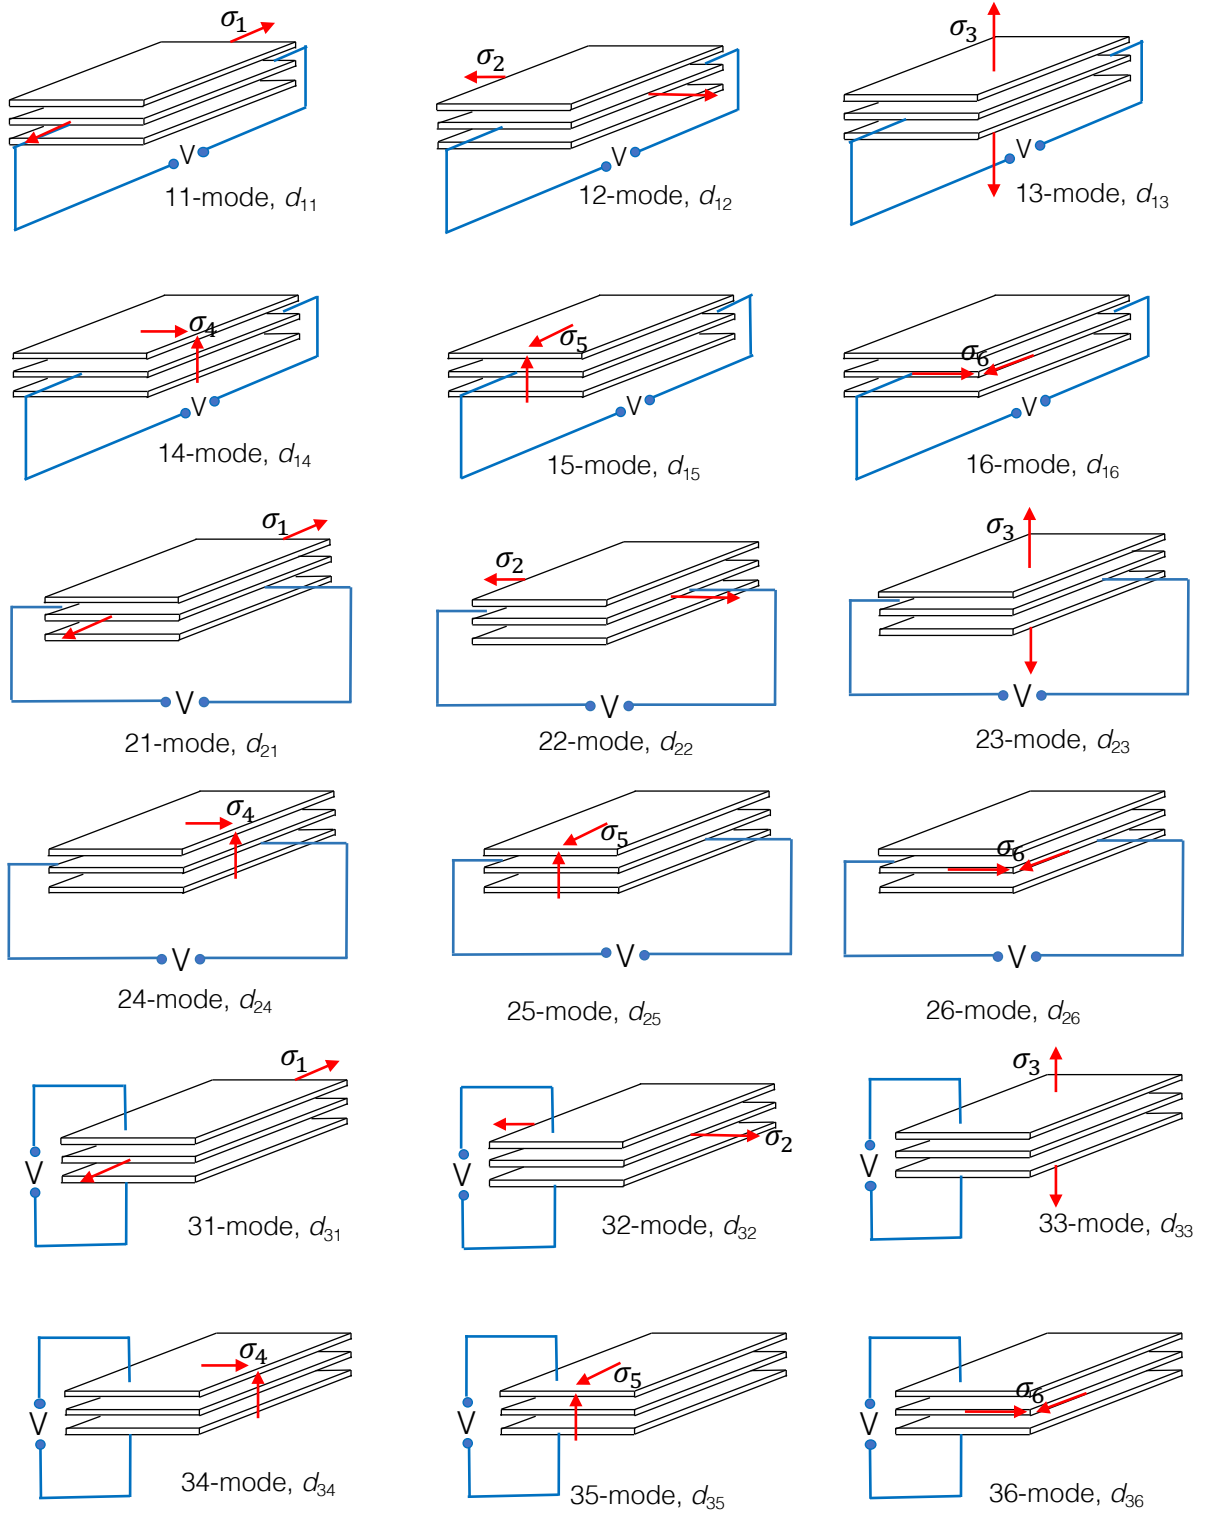

FIG. S3: Schematics of the modes of  $d$  with their measuring polarization directions and deformation stresses. Each mode represents each component of  $d$ -matrix

### E. Rotation of $d$ , $e$ , & $C$ -matrices

In our reported 63 quasi-2D piezoelectric materials, we found that in 19 candidates the layer stacking direction is not along [001]-direction. To maintain consistency and capture the effect of van der Waals bond on piezoelectric response, we rotate their  $d$ ,  $e$ , and  $C$ -matrix into the co-ordinate frame such that the layering direction is always along [001]-direction. The matrix transformation in going from the old to the new coordinate system[11, 12] is,

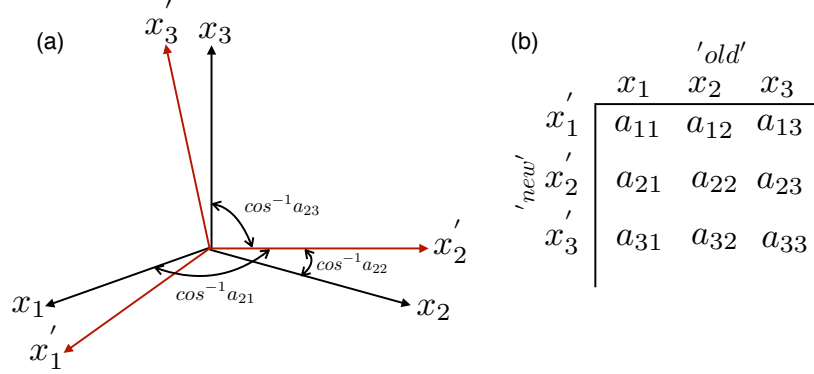

FIG. S4: (a) 'old' and 'new' co-ordinate frames (b) The angular relations between the axes is specified by drawing up a table of direction cosines which is denoted by  $\mathbf{a}$ -matrix

$$\mathbf{e}' = (\mathbf{a})(\mathbf{e})(\alpha^{-1}) \quad (1)$$

$$\mathbf{d}' = (\mathbf{a})(\mathbf{d})(\alpha^{-1}) \quad (2)$$

$$\mathbf{C}' = (\alpha)(\mathbf{C})(\alpha_t) \quad (3)$$

Where,  $\mathbf{a}$  is the direction cosine matrix, given by,

$$\begin{bmatrix} a_{11} & a_{12} & a_{13} \\ a_{21} & a_{22} & a_{23} \\ a_{31} & a_{32} & a_{33} \end{bmatrix}$$

Elements of  $\alpha$  is given by,

$$\begin{bmatrix} (a_{11}^2) & (a_{12}^2) & (a_{13}^2) & (2a_{12}a_{13}) & (2a_{13}a_{11}) & (2a_{11}a_{12}) \\ (a_{21}^2) & (a_{22}^2) & (a_{23}^2) & (2a_{22}a_{23}) & (2a_{23}a_{21}) & (2a_{21}a_{22}) \\ (a_{31}^2) & (a_{32}^2) & (a_{33}^2) & (2a_{32}a_{33}) & (2a_{33}a_{31}) & (2a_{31}a_{32}) \\ (a_{21}a_{31}) & (a_{22}a_{32}) & (a_{23}a_{33}) & (a_{22}a_{33}) + (a_{23}a_{32}) & (a_{21}a_{33}) + (a_{23}a_{31}) & (a_{22}a_{31}) + (a_{21}a_{32}) \\ (a_{31}a_{11}) & (a_{32}a_{12}) & (a_{33}a_{13}) & (a_{12}a_{33}) + (a_{13}a_{32}) & (a_{13}a_{31}) + (a_{11}a_{33}) & (a_{11}a_{32}) + (a_{12}a_{31}) \\ (a_{11}a_{21}) & (a_{12}a_{22}) & (a_{13}a_{23}) & (a_{12}a_{23}) + (a_{13}a_{22}) & (a_{13}a_{21}) + (a_{11}a_{23}) & (a_{11}a_{22}) + (a_{12}a_{21}) \end{bmatrix}$$

For detail derivation of these transformations please see reference [11, 12].

### F. Comparison of $d_{max}$ with different vdW corrected functionals.

We also calculate  $d_{max}$  using Grimme D3 and Tkatchenko & Scheffler corrected functional. The results are shown in Table S2.

TABLE S2: Comparison of  $d_{max}$  (in pC/N) calculated with optB86, Grimme D3 and self-consistent Tkatchenko & Scheffler functionals (SCTS) vdW-corrected functionals. The component in the parenthesis describes  $d_{ij}$  appearing as  $d_{max}$

|                                  | $d_{max}(\text{optB86})$ | $d_{max}(\text{D3})$ | $d_{max}(\text{SCTS})$ |
|----------------------------------|--------------------------|----------------------|------------------------|
| GeTe                             | 148.4 ( $d_{15}$ )       | 147.7 ( $d_{15}$ )   | 199.4 ( $d_{15}$ )     |
| BiInO <sub>3</sub>               | 56.1 ( $d_{33}$ )        | 56 ( $d_{33}$ )      | 38.4 ( $d_{33}$ )      |
| NaI <sub>3</sub> O <sub>8</sub>  | 48.4 ( $d_{14}$ )        | 48 ( $d_{14}$ )      | 52.1 ( $d_{14}$ )      |
| NaN <sub>3</sub>                 | 40.7 ( $d_{36}$ )        | 23.5 ( $d_{35}$ )    | 40 ( $d_{32}$ )        |
| Cs <sub>2</sub> Te <sub>3</sub>  | 31.3 ( $d_{36}$ )        | 12 ( $d_{36}$ )      | 12 ( $d_{36}$ )        |
| Bi <sub>2</sub> MoO <sub>6</sub> | 28.7 ( $d_{26}$ )        | 24.6( $d_{33}$ )     | 24.6( $d_{33}$ )       |
| AgI                              | 27.8 ( $d_{33}$ )        | 166.7 ( $d_{33}$ )   | 135.1 ( $d_{33}$ )     |
| SbF <sub>2</sub> Cl <sub>3</sub> | 24.4 ( $d_{15}$ )        | 62.5 ( $d_{15}$ )    | 71.4 ( $d_{15}$ )      |
| PbRb <sub>2</sub> O <sub>3</sub> | 22.2 ( $d_{34}$ )        | 40.5 ( $d_{15}$ )    | 16.6 ( $d_{15}$ )      |
| BiGeO <sub>5</sub>               | 21.1 ( $d_{33}$ )        | 31.6 ( $d_{33}$ )    | 33.4 ( $d_{33}$ )      |

### G. Quasi-2D materials with isotropic axial elastic anisotropy and anisotropic axial piezoelectric coefficient

We have inspected the crystal structures of materials that have isotropic axial elastic modulus. Although these materials have layered structures, the spatial gap between the layers is very small. They rather fall in the borderline category between bulk 3D and quasi-2D structures. The crystal structures of these materials are shown in Figure S5. The crystal structures of these materials are shown in Figure S5. The reason for isotropic axial elastic anisotropy is the small vdW gap implying residual chemical interactions between the layers. The axial anisotropic behavior between elastic modulus and piezoelectric responses differ from each other since the elastic tensor implies straining chemical bonds whereas the piezoelectric coefficient tensor describes the charge redistribution upon straining the bonds. One example that illustrates this is AlN, which has an isotropic elastic modulus but highly-anisotropic piezoelectric coefficients [13].

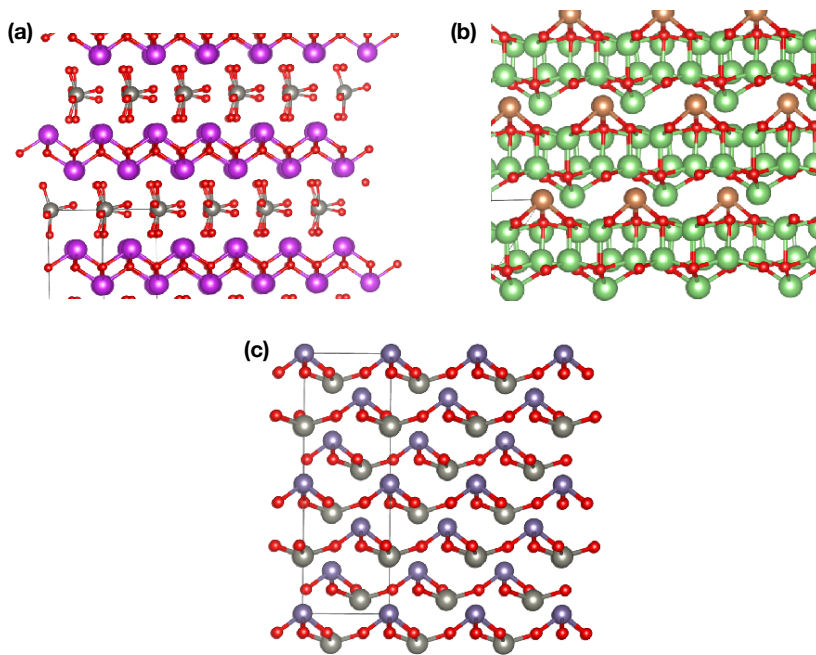

FIG. S5: Crystal structures of (a)Bi<sub>2</sub>WO<sub>6</sub>, (b) Li<sub>7</sub>SbO<sub>6</sub>, and (c) GeZnO<sub>3</sub>. All these materials have layered structures with small vdW gap.

- 
- [1] W. Stirling, B. Dorner, J. Cheeke, and J. Revelli, Solid State Communications **18**, 931 (1976).
  - [2] J. Jenkins, J. Rayne, and R. Ure, Physics Letters A **30**, 349 (1969).
  - [3] M. Gatulle, M. Fischer, and A. Chevy, physica status solidi (b) **119**, 327 (1983).
  - [4] B. Dorner, R. Ghosh, and G. Harbeke, physica status solidi (b) **73**, 655 (1976).
  - [5] E. Tato, T. Komatsu, and Y. Kaifu, Journal of the Physical Society of Japan **54**, 3597 (1985).
  - [6] M. Sato and K. Abe, Journal of Physics C: Solid State Physics **12**, L613 (1979).
  - [7] D. E. Moncton, J. Axe, and F. DiSalvo, Physical Review B **16**, 801 (1977).
  - [8] S. Haussühl and H. Scholz, Crystal Research and Technology **10**, 1175 (1975).
  - [9] J. Sandercock, Festkörperprobleme 15 pp. 183–202 (1975).
  - [10] J. Feldman, Journal of Physics and Chemistry of Solids **37**, 1141 (1976).
  - [11] J. F. Nye, *Physical properties of crystals: their representation by tensors and matrices* (Oxford university press, 1985).
  - [12] R. E. Newnham, *Properties of materials: anisotropy, symmetry, structure* (Oxford University Press on Demand, 2005).
  - [13] S. Gevorgian, A. Tagantsev, and A. K. Vorobiev, *Tuneable film bulk acoustic wave resonators* (Springer Science & Business Media, 2013).
