# Supplementary material for: Large piezoelectric response of van der Waals layered solids
Source: Royal Society of Chemistry journal article supplement (doi:10.1039/c8tc02560f), 2018-01-01
Supplement: c8tc02560f1.zip [file c8tc02560f1.zip]

Archive with 4 entries (4 files):
- piezo2d-supplementary-informations.pdf
- quasi-2D-compounds.xlsx
- results-d-e-C.xlsx
- Structure_Files.pdf
