# Supplementary material for: Large piezoelectric response of van der Waals layered solids
Source: Royal Society of Chemistry journal article supplement (doi:10.1039/c8tc02560f), 2018-01-01
Supplement: c8tc02560f1.zip [file c8tc02560f1.zip › quasi-2D-compounds.xlsx]

## Sheet: binary
compound	icsd
Ag1Cl1	icsd_056545
Ag1F2	icsd_020453
Ag1F2	icsd_006277
Ag1I1	icsd_028230
Ag1I1	icsd_001899
Ag2F1	icsd_068441
Ag2O1	icsd_020368
Ag6O2	icsd_026557
Al1Cl3	icsd_039566
Al2Te3	icsd_406353
As1Ba2	icsd_087345
As1Ca2	icsd_042357
As1Ge1	icsd_610598
As1P1	icsd_602979
As1Sr2	icsd_044066
As2Ge1	icsd_023872
As2Hf3	icsd_610637
As2O3	icsd_100434
As2O4	icsd_010436
As2S3	icsd_015239
As2Se3	icsd_043226
As2Si1	icsd_611405
As2Ta1	icsd_107966
As2Zr3	icsd_611611
Au1Br1	icsd_200287
Au1Br1	icsd_200286
Au1Cl1	icsd_006052
Au1I1	icsd_024619
Au1Se1	icsd_073669
Au1Te2	icsd_038213
Au1Te2	icsd_659331
Au3F8	icsd_089620
B1N1	icsd_240999
B1N1	icsd_162871
B1N1	icsd_162870
B1N1	icsd_027987
B1N1	icsd_020946
B1N1	icsd_077374
B1N1	icsd_162883
B1N1	icsd_027986
Ba1O1	icsd_173922
Ba2N1	icsd_409851
Bi1Br3	icsd_100294
Bi1I3	icsd_053634
Bi1I3	icsd_020676
Bi1In1	icsd_616703
Bi1O1	icsd_030361
Bi1Se1	icsd_617073
Bi1Te1	icsd_100654
Bi1Ti2	icsd_617225
Bi2O3	icsd_168810
Bi2O3	icsd_015752
Bi2O3	icsd_041764
Bi2Pd1	icsd_056280
Bi2Pd1	icsd_042565
Bi2Pt1	icsd_058847
Bi2Se2	icsd_020458
Bi2Se3	icsd_042545
Bi2Te3	icsd_020289
Bi2Te3	icsd_184631
Bi4Se3	icsd_617074
Bi9I2	icsd_039257
Br1Cu1	icsd_078277
Br1In1	icsd_055189
Br1Tl1	icsd_109144
Br1Zr1	icsd_001168
Br2Cd1	icsd_052367
Br2Cd1	icsd_025782
Br2Cd1	icsd_031536
Br2Co1	icsd_052364
Br2Fe1	icsd_409571
Br2Hg1	icsd_151889
Br2Mg1	icsd_165972
Br2Mn1	icsd_067500
Br2Mn1	icsd_060250
Br2Ni1	icsd_022106
Br2Pb1	icsd_036170
Br2Ti1	icsd_026078
Br2V1	icsd_246906
Br2Zn1	icsd_026080
Br3Cr1	icsd_024768
Br3Fe1	icsd_076421
Br3In1	icsd_065198
Br3Rh1	icsd_028245
Br3Ti1	icsd_039242
Br3Ti1	icsd_039784
Ca1I2	icsd_052280
Ca2N1	icsd_022231
Ca3N2	icsd_162797
Cd1Cl2	icsd_030255
Cd1I2	icsd_042201
Cd1I2	icsd_044797
Cd1I2	icsd_108924
Cd1I2	icsd_020745
Cd1I2	icsd_053983
Cd1I2	icsd_042268
Cl1In1	icsd_002432
Cl1In1	icsd_002430
Cl1Sc1	icsd_001004
Cl1Tl1	icsd_109143
Cl1Y1	icsd_061107
Cl1Zr1	icsd_000868
Cl2Co1	icsd_015939
Cl2Fe1	icsd_027810
Cl2Fe1	icsd_064831
Cl2Mg1	icsd_051245
Cl2Mg1	icsd_017063
Cl2Mg1	icsd_056147
Cl2Mg1	icsd_051247
Cl2Mn1	icsd_033752
Cl2Ni1	icsd_014208
Cl2Pd1	icsd_421221
Cl2Ti1	icsd_023177
Cl2V1	icsd_246905
Cl2Zn1	icsd_026152
Cl2Zr1	icsd_030052
Cl3Cr1	icsd_022080
Cl3Cr1	icsd_022081
Cl3Fe1	icsd_063329
Cl3Fe1	icsd_039765
Cl3Mo1	icsd_026109
Cl3Mo1	icsd_026108
Cl3Rh1	icsd_025764
Cl3Ru1	icsd_020717
Cl3Sc1	icsd_074517
Cl3Ti1	icsd_039426
Cl3Ti1	icsd_026070
Cl3Ti1	icsd_039430
Cl3Ti1	icsd_039428
Cl3Ti1	icsd_029035
Cl3Ti1	icsd_039427
Cl3V1	icsd_038237
Cl3Y1	icsd_015684
Cl3Zr1	icsd_043292
Cl4Mo1	icsd_035139
Cl4Zr1	icsd_026049
Cl8Nb3	icsd_408645
Co1F3	icsd_029133
Co1I2	icsd_052368
Co1O2	icsd_095440
Co1O2	icsd_088722
Co1Se1	icsd_162902
Co1Te2	icsd_625401
Cr1F2	icsd_031827
Cr1S2	icsd_075420
Cr1Se1	icsd_162899
Cr1Se2	icsd_626718
Cr3Te4	icsd_626873
Cs2O1	icsd_027919
Cs2Te3	icsd_053245
Cu1F2	icsd_009789
Cu1I1	icsd_030363
Cu1I1	icsd_080232
Cu1I1	icsd_084217
Cu1I1	icsd_246688
Cu1S1	icsd_063328
Cu1Se1	icsd_082330
Cu1Se1	icsd_162904
Cu1Te1	icsd_043273
Cu2S1	icsd_020560
Cu8O1	icsd_062764
F1Tl1	icsd_028495
F1Tl1	icsd_030268
F1Tl1	icsd_016113
F2Pb1	icsd_154998
F2Zn1	icsd_020364
F3Fe1	icsd_029132
F3Pd1	icsd_029135
F3Rh1	icsd_029134
F4Nb1	icsd_023949
F4Pb1	icsd_016795
F4Ru1	icsd_165398
F4Sn1	icsd_016794
F4V1	icsd_065785
F8Sn3	icsd_061162
F8Sn3	icsd_032592
Fe1I2	icsd_052369
Fe1S1	icsd_182250
Fe1Se1	icsd_165938
Fe1Se1	icsd_169257
Fe1Se1	icsd_169297
Fe1Te1	icsd_044753
Fe2N1	icsd_020390
Fe3N1	icsd_260758
Fe3S4	icsd_044885
Fe3S4	icsd_042537
Fe3Se4	icsd_633484
Ga1P1	icsd_635031
Ga1S1	icsd_053587
Ga1S1	icsd_040824
Ga1S1	icsd_635254
Ga1Se1	icsd_041978
Ga1Se1	icsd_073387
Ga1Se1	icsd_002002
Ga1Se1	icsd_660262
Ga1Se1	icsd_073388
Ga1Te1	icsd_008249
Ga1Te1	icsd_043328
Ge1I2	icsd_027674
Ge1I2	icsd_023176
Ge1P1	icsd_637492
Ge1P3	icsd_016294
Ge1S1	icsd_155418
Ge1S1	icsd_038165
Ge1Se1	icsd_637853
Ge1Te1	icsd_655497
Ge1Te1	icsd_638005
Hf1O2	icsd_173966
Hf1S2	icsd_638847
Hf1Se2	icsd_603743
Hf1Te2	icsd_603713
Hf1Te5	icsd_085509
Hf2S1	icsd_043203
Hf3Te2	icsd_075936
Hg1I2	icsd_281133
Hg1I2	icsd_022401
Hg1I2	icsd_181575
Hg1N6	icsd_021029
Hg2I4	icsd_241172
I1In1	icsd_055183
I1Tl1	icsd_055199
I2Mg1	icsd_052279
I2Mn1	icsd_033673
I2Ni1	icsd_022108
I2Pb1	icsd_068819
I2Pb1	icsd_024264
I2Pb1	icsd_077325
I2Pb1	icsd_108914
I2Pb1	icsd_042014
I2Pb1	icsd_024263
I2Sn1	icsd_002831
I2V1	icsd_246907
I2Zn1	icsd_077058
I2Zr1	icsd_024807
I2Zr1	icsd_026418
I3Sb1	icsd_056572
I3Y1	icsd_170773
In1Sb1	icsd_010022
In1Sb1	icsd_156995
In1Se1	icsd_640503
In1Se1	icsd_032714
In1Se1	icsd_041477
In1Se1	icsd_030377
In1Se1	icsd_071083
In2Se3	icsd_602266
In2Se3	icsd_017008
In2Te5	icsd_000501
Mn1Se1	icsd_162900
Mo1N1	icsd_060168
Mo1N1	icsd_168369
Mo1O3	icsd_644067
Mo1O3	icsd_030258
Mo1S2	icsd_644259
Mo1S2	icsd_084180
Mo1S2	icsd_095570
Mo1S2	icsd_038401
Mo1Se2	icsd_644346
Mo1Se2	icsd_049800
Mo1Se2	icsd_016948
Mo1Te2	icsd_024155
Mo1Te2	icsd_014349
N1Sr2	icsd_411612
N2Zr1	icsd_262746
N3Na1	icsd_029380
N4Si3	icsd_156337
Nb1P1	icsd_076027
Nb1S2	icsd_024755
Nb1S2	icsd_079514
Nb1S2	icsd_072725
Nb1S2	icsd_069043
Nb1S2	icsd_068968
Nb1S2	icsd_068702
Nb1S2	icsd_043696
Nb1S2	icsd_089238
Nb1S2	icsd_043697
Nb1S2	icsd_067443
Nb1S3	icsd_645323
Nb1S3	icsd_645316
Nb1Se2	icsd_073093
Nb1Se2	icsd_071339
Nb1Se2	icsd_018129
Nb1Se2	icsd_076576
Nb1Se2	icsd_076577
Nb1Se2	icsd_018131
Nb1Se2	icsd_074335
Nb1Se2	icsd_018132
Nb1Se2	icsd_016305
Nb1Se3	icsd_076579
Nb1Se3	icsd_076578
Nb1Te2	icsd_645529
Nb1Te2	icsd_014389
Nb2O5	icsd_025765
Ni1O2	icsd_088720
Ni1O2	icsd_078698
Ni1Se1	icsd_162903
Ni1Te1	icsd_076730
Ni1Te2	icsd_646914
O1Pb1	icsd_036250
O1Pb1	icsd_653900
O1Pb1	icsd_062847
O1Pb1	icsd_064778
O1Pd1	icsd_028837
O1Pd1	icsd_041617
O1Sn1	icsd_041954
O1Sn1	icsd_020624
O1Ti2	icsd_023574
O1Ti3	icsd_024082
O1Ti3	icsd_036055
O1Ti6	icsd_023576
O1Tl2	icsd_016220
O1Tl2	icsd_077699
O1Zn1	icsd_181039
O2Pt1	icsd_024923
O2Te1	icsd_167816
O2V1	icsd_001503
O2V1	icsd_074705
O2Zr1	icsd_088022
O2Zr1	icsd_164736
O2Zr1	icsd_092091
O3Sb2	icsd_183102
O3W1	icsd_050732
O3W1	icsd_084141
O3W1	icsd_088367
O3W1	icsd_050731
O3W1	icsd_080053
O3Y2	icsd_181828
O4Sn3	icsd_174299
O5P2	icsd_079698
O5Ta2	icsd_280396
O8W3	icsd_073719
P1Ta1	icsd_108656
P2Si1	icsd_043098
Pb1S1	icsd_068712
Pb1S1	icsd_183250
Pb1S1	icsd_068701
Pb1S1	icsd_068969
Pb1S1	icsd_183255
Pb1S1	icsd_183243
Pb1S1	icsd_648451
Pb1Se1	icsd_074334
Pb1Se1	icsd_648514
Pd1S2	icsd_016694
Pd1Se2	icsd_648838
Pd1Te2	icsd_649016
Pt1S2	icsd_659963
Pt1Se2	icsd_649594
Pt1Te1	icsd_041370
Pt1Te1	icsd_041383
Pt1Te2	icsd_041373
Pt2Te3	icsd_087398
Pt2Te3	icsd_041371
Pt3Te4	icsd_087397
Pt3Te4	icsd_041372
Rb2Te3	icsd_077994
Rh1Te2	icsd_026618
S1Sn1	icsd_079129
S1Sn1	icsd_100672
S1Sn1	icsd_651025
S1Y1	icsd_069042
S1Zr1	icsd_024754
S2Sn1	icsd_043003
S2Sn1	icsd_650993
S2Ta1	icsd_651098
S2Ta1	icsd_079130
S2Ta1	icsd_067651
S2Ta1	icsd_651086
S2Ta1	icsd_043410
S2Ta1	icsd_280988
S2Ta1	icsd_068488
S2Ta1	icsd_024757
S2Ti1	icsd_181503
S2Ti1	icsd_651214
S2Ti1	icsd_083828
S2Ti1	icsd_079803
S2V1	icsd_086519
S2V1	icsd_068713
S2V1	icsd_077832
S2W1	icsd_084181
S2W1	icsd_202367
S2W1	icsd_202366
S2Y1	icsd_651404
S2Zr1	icsd_604434
S3Sb2	icsd_082871
S3Ta1	icsd_015251
S4V3	icsd_651369
Sb1Te1	icsd_600629
Sb2Te1	icsd_069557
Sb2Te2	icsd_020459
Sb2Te3	icsd_002084
Sb2Te3	icsd_262172
Sb8Te3	icsd_152188
Se1Sn1	icsd_651925
Se1Sn1	icsd_050557
Se1Ta2	icsd_065739
Se1Ti1	icsd_162897
Se1V1	icsd_162898
Se1Zn1	icsd_162905
Se2Sn1	icsd_651910
Se2Ta1	icsd_651954
Se2Ta1	icsd_024318
Se2Ta1	icsd_018133
Se2Ta1	icsd_026249
Se2Ta1	icsd_072198
Se2Ta1	icsd_651961
Se2Ta1	icsd_024316
Se2Ta1	icsd_651958
Se2Ti1	icsd_652045
Se2Ti1	icsd_077830
Se2V1	icsd_086520
Se2W1	icsd_084182
Se2W1	icsd_040752
Se2Zr1	icsd_652244
Se3Ta1	icsd_043243
Se3Ta1	icsd_651959
Se3Tl5	icsd_020826
Se3Zr1	icsd_652233
Si1Te2	icsd_080205
Sn1Te1	icsd_652743
Ta1Te2	icsd_014390
Te2Ti1	icsd_603791
Te2V1	icsd_603582
Te2W1	icsd_653171
Te2Zr1	icsd_653213
Te3Y1	icsd_653175
Te3Zr1	icsd_071033
Te5Zr1	icsd_085506

## Sheet: Sheet1
compound	icsd
Ag1Au1Cl4	icsd_001152
Ag1Bi1O3	icsd_091777
Ag1Cs1O1	icsd_040160
Ag1Cs1O1	icsd_025745
Ag1Cu1O2	icsd_093880
Ag1Cu1O2	icsd_095089
Ag1Cu1Te2	icsd_042482
Ag1F6Sn1	icsd_051505
Ag1I1O3	icsd_014100
Ag1Sb1Te2	icsd_246486
Ag2Cu2O4	icsd_095384
Ag2Ge1S3	icsd_041711
Ag2Ni1O2	icsd_172558
Ag2Ni1O2	icsd_172559
Ag2O2Pd1	icsd_051499
Ag3K1Te2	icsd_402230
Ag3Ni2O4	icsd_172878
Ag3Te2Tl1	icsd_042483
Ag3Te2Tl1	icsd_071081
Ag8Se6Sn1	icsd_095093
Al1B1Mo1	icsd_016777
Al1Br4Tl1	icsd_419829
Al1Cl1O1	icsd_027812
Al1Cl4K1	icsd_001704
Al1I2Pd5	icsd_014164
Al1Li5O4	icsd_016229
Al1P1S4	icsd_015910
Al1Si1Te3	icsd_075001
Al2Br8Ti1	icsd_039243
Al2Cd1Cl8	icsd_062037
Al2Cd2Cl8	icsd_062038
Al2Cl8Co1	icsd_022143
Al2Cl8Mg1	icsd_062046
Al2Cl8Ti1	icsd_039565
Al2Cl8V1	icsd_415951
Al2Fe1S4	icsd_607619
Al2Mg1S4	icsd_608441
Al2Mg1Se4	icsd_083363
Al2Mg1Se4	icsd_041926
Al2Mg2Se5	icsd_041928
Al2Mn1S4	icsd_608511
Al2N2Ti3	icsd_052643
Al2S4Zn1	icsd_609280
As1Br5F6	icsd_069057
As1Ca1Rb1	icsd_409177
As1Co1Li1	icsd_107932
As1Cs1Mn1	icsd_040573
As1Cu1Li2	icsd_043938
As1Fe1Li1	icsd_042331
As1Ge1Nb1	icsd_610611
As1Ge1Se1	icsd_100828
As1K1O2	icsd_413149
As1K1Sn1	icsd_040815
As1Mn1Rb1	icsd_610910
As1Na1O2	icsd_016762
As1Ni2Si1	icsd_083753
As1O2Rb1	icsd_413150
As1O3Sb1	icsd_037187
As1O4P1	icsd_031879
As1O5V1	icsd_261321
As2O4Zn1	icsd_202249
As2Pb1S4	icsd_024449
As2Sn2Sr1	icsd_611428
As5I1Te7	icsd_031877
Au1Bi1Br6	icsd_407220
Au1Bi1Cl6	icsd_407221
Au1Cs1O1	icsd_043006
Au1Cs1Te1	icsd_071653
Au1F4Li1	icsd_009908
Au1I1Te1	icsd_001661
Au1I4Li1	icsd_406967
Au1K5P2	icsd_040700
Au1O1Rb1	icsd_409552
Au2O7Se2	icsd_037009
Au4S3Tl2	icsd_051235
B1Fe2Ni1	icsd_614129
B1S3Tl1	icsd_073085
B2Ba1Se6	icsd_411967
Ba1F4Sn1	icsd_166207
Ba1Ge1Mn1	icsd_066965
Ba1Mg1Sn1	icsd_615965
Ba1O4W1	icsd_052384
Ba2Cu1F6	icsd_021055
Ba2Cu1F6	icsd_021035
Ba2F6Ni1	icsd_021056
Ba2F6Zn1	icsd_021054
Ba2Li1N1	icsd_245651
Ba2Nb5O9	icsd_078023
Ba2O4Pb1	icsd_062036
Ba2O4Zr1	icsd_039707
Ba3O6Sb2	icsd_413764
Be2Cl6Te7	icsd_391156
Bi1Br1O1	icsd_061225
Bi1Ca1K1	icsd_409664
Bi1Cl1O1	icsd_024608
Bi1Cl1Te1	icsd_079362
Bi1Co1O3	icsd_157833
Bi1Cu1S2	icsd_038779
Bi1Fe1O3	icsd_162264
Bi1I1O1	icsd_024610
Bi1I1Te1	icsd_074501
Bi1I1Te1	icsd_079364
Bi1In1O3	icsd_171756
Bi1Mn1Rb1	icsd_616824
Bi1Nb1O4	icsd_010247
Bi1O4P1	icsd_060522
Bi1O4V1	icsd_100603
Bi2Ge1O5	icsd_062488
Bi2Ge3O9	icsd_100277
Bi2Hg1S4	icsd_014189
Bi2Mo1O6	icsd_017070
Bi2O4Sr1	icsd_080668
Bi2O6W1	icsd_023584
Bi2O9Si3	icsd_155234
Bi2S1Te2	icsd_026720
Bi2Se1Te2	icsd_043512
Bi2Se2Te1	icsd_054838
Br1Cr1O1	icsd_027092
Br1Cu1Se2	icsd_410004
Br1F4Rb1	icsd_065713
Br1Hf1N1	icsd_051773
Br1Hf1N1	icsd_095720
Br1In1O1	icsd_024059
Br1In1Te1	icsd_100705
Br1N1Ti1	icsd_027395
Br1N1Zr1	icsd_027393
Br1N1Zr1	icsd_087797
Br1N1Zr1	icsd_025507
Br1O1Sc1	icsd_170774
Br1O1Ti1	icsd_010419
Br1O1Ti1	icsd_240499
Br1O1V1	icsd_027010
Br1O3Tl1	icsd_076966
Br2O1V1	icsd_024381
Br3Hg2Te1	icsd_417407
Br4Ga1In1	icsd_069652
Br4In1Na1	icsd_065462
Br4Pd4Te3	icsd_418003
Br4S9V4	icsd_415351
Br5Cs1Hg2	icsd_200751
Br7Nb3S1	icsd_081078
Br7S1Ta3	icsd_051101
Br8Ga2Pd1	icsd_413229
Ca1Cl2O4	icsd_171020
Ca1Ga1N1	icsd_002027
Ca1Ge1Mn1	icsd_066957
Ca1Mn1Si1	icsd_066955
Ca1Mn1Sn1	icsd_066959
Ca1Rb1Sb1	icsd_409178
Ca2Co1O3	icsd_095439
Ca2I1N1	icsd_153107
Ca2I1N1	icsd_065216
Ca2In1N1	icsd_096228
Ca3Mn2O7	icsd_096698
Cd1P1S3	icsd_079556
Cd1P1S3	icsd_080875
Cd2Mn3O8	icsd_016957
Cd2P2Se6	icsd_620237
Cl1Cr1O1	icsd_004086
Cl1Cu1Se2	icsd_068292
Cl1Cu1Te2	icsd_000641
Cl1Fe1O1	icsd_167393
Cl1Ga1Te1	icsd_015582
Cl1Hf1N1	icsd_261541
Cl1In1O1	icsd_024058
Cl1K1O3	icsd_009483
Cl1Li1O2	icsd_059936
Cl1N1Ti1	icsd_027396
Cl1N1Zr1	icsd_151468
Cl1N1Zr1	icsd_025506
Cl1N5S5	icsd_062528
Cl1O1Ti1	icsd_155833
Cl1O1V1	icsd_027011
Cl1O1Y1	icsd_060585
Cl1Rh1Te1	icsd_405714
Cl1Rh1Te1	icsd_406932
Cl2Hg2O6	icsd_412963
Cl2N1Sc2	icsd_059125
Cl2O1Ru1	icsd_083883
Cl2O1V1	icsd_024380
Cl2O4Pb1	icsd_068484
Cl2O4Sr1	icsd_171021
Cl3F2Sb1	icsd_200039
Cl4Cr1Rb2	icsd_041570
Cl4Fe1K1	icsd_063469
Cl4I1K1	icsd_030203
Cl6Fe1Hf1	icsd_039817
Cl6Fe1Zr1	icsd_039666
Cl6Na1Nb1	icsd_036518
Cl6Na1Ta1	icsd_036519
Cl7Nb3Te1	icsd_079213
Co1Li1O2	icsd_246307
Co1Nb1Te2	icsd_071519
Co1Nb1Te2	icsd_073739
Co1P1Pd1	icsd_624599
Co1P1S3	icsd_061394
Co1P1S3	icsd_624615
Co1Si2Y1	icsd_625129
Co1Ta1Te2	icsd_073738
Co2Nb2Te4	icsd_071196
Co2Ta1Te2	icsd_071197
Cr1Cu1O4	icsd_183216
Cr1F6Mo1	icsd_050507
Cr1F6Nb1	icsd_075384
Cr1Ga2S4	icsd_626052
Cr1Hg1O4	icsd_002224
Cr1N1Nb1	icsd_023779
Cr1N1Nb1	icsd_016496
Cr1O5Pb2	icsd_034831
Cr1Si1Te3	icsd_626810
Cr2Ge2Te6	icsd_079268
Cr2K2O7	icsd_015824
Cr2Si2Te6	icsd_071020
Cr2Si2Te6	icsd_062379
Cs1F7Sb2	icsd_024741
Cs1Mn1P1	icsd_089598
Cs1Mn1Sb1	icsd_041869
Cs1N7P4	icsd_410632
Cs1O2Sb1	icsd_059329
Cs2Cu1O2	icsd_039535
Cs2O3Sn2	icsd_024392
Cu1F6Zr1	icsd_030117
Cu1Ge1O3	icsd_056702
Cu1Ge1O3	icsd_025754
Cu1Ge1O3	icsd_411019
Cu1I1Te2	icsd_067253
Cu1I2O6	icsd_004327
Cu1In2O4	icsd_039475
Cu1K1O1	icsd_025695
Cu1Li2O2	icsd_174134
Cu1Li2P1	icsd_016248
Cu1Mn1O2	icsd_158960
Cu1Mo1O4	icsd_084919
Cu1Mo1O4	icsd_160867
Cu1O1Rb1	icsd_015100
Cu1O3Si1	icsd_089669
Cu1O3Te1	icsd_202451
Cu1O3V1	icsd_009414
Cu1S2Sb1	icsd_030280
Cu1S3Ta1	icsd_043272
Cu1Sb1Se2	icsd_030358
Cu1Si2Zr1	icsd_629236
Cu2Li1P1	icsd_628282
Cu2O3Sr1	icsd_095957
Cu2O3Sr2	icsd_068676
Cu2O3Sr2	icsd_150912
Cu2S4W1	icsd_098909
Cu2S4W1	icsd_072529
F1I1Pb1	icsd_279599
F1I1Sr1	icsd_159280
F1Pb3Sr5	icsd_165195
F2N1P1	icsd_009684
F2O1Pb2	icsd_076964
F3Fe1Na1	icsd_068981
F4Hg1Rb2	icsd_072352
F4Na1Sb1	icsd_200573
F4Pb1Sn1	icsd_152951
F5K1Sn2	icsd_036452
F5K2Sb1	icsd_024742
F7K1Sb2	icsd_014118
F8I2Pb5	icsd_036334
F9K1Te2	icsd_084364
Fe1Ga2S4	icsd_100706
Fe1In2Se4	icsd_168670
Fe1Li1P1	icsd_042327
Fe1Nb1Te2	icsd_071520
Fe1P1S3	icsd_633085
Fe1P1S3	icsd_061392
Fe1P1Se3	icsd_633094
Fe1S2Tl1	icsd_030011
Fe1S4Sb2	icsd_093911
Fe2Ga2S5	icsd_049912
Fe2Ga2S5	icsd_032551
Fe2In1O4	icsd_157323
Fe2In2Se5	icsd_155025
Fe2P2S6	icsd_016252
Fe2P2Se6	icsd_056890
Fe2P2Se6	icsd_016246
Ga1Ge1Te1	icsd_035386
Ga1In1S3	icsd_062340
Ga1P1S4	icsd_002613
Ga2I2Y2	icsd_417149
Ga2I8Pd1	icsd_413230
Ga2Mn1S4	icsd_634670
Ga2Ni1S4	icsd_634901
Ga2Se2Te1	icsd_064617
Ge1Hf1Te4	icsd_241122
Ge1I2Y2	icsd_249477
Ge1Mg1Mn1	icsd_066952
Ge1Mn1Sr1	icsd_053707
Ge1Nb1Sb1	icsd_637231
Ge1Nb3Te6	icsd_072208
Ge1Ni2P1	icsd_083754
Ge1O3Zn1	icsd_183725
Ge1Sb4Te7	icsd_042875
Ge1Te1Zr1	icsd_025740
Ge1Te4Zr1	icsd_240906
Ge2N2Sr3	icsd_082533
Ge2S6Tl4	icsd_002240
Ge3O9Sb2	icsd_095735
Hf1I1N1	icsd_051774
Hf1Si1Te1	icsd_025737
Hf1Si1V1	icsd_638931
Hg2O7V2	icsd_002517
Hg2P2S6	icsd_002564
Hg2P2S7	icsd_002490
Hg2P2Se6	icsd_002565
Hg3O6S1	icsd_096753
Hg3O6S1	icsd_024147
Hg3S4Tl2	icsd_182745
Hg3Se4Tl2	icsd_182746
Hg4O7P2	icsd_410762
I1In1Te1	icsd_100703
I1N1Ti1	icsd_027394
I1N1Zr1	icsd_036119
I1N1Zr1	icsd_051772
I1O1Sc1	icsd_419335
I1Ta1Te4	icsd_067533
I2O1Ta1	icsd_080109
I3Na1O8	icsd_418336
I4In1Li1	icsd_036599
I6S1Sn4	icsd_012165
I7Nb3Te1	icsd_086723
I7Nb3Te1	icsd_086724
I7Se1Ta3	icsd_082791
I7Ta3Te1	icsd_082792
In1Si1Te3	icsd_066356
In2Mn1Se4	icsd_069696
In2S4Zn1	icsd_016200
In2S4Zn1	icsd_044637
In2S4Zn1	icsd_660273
In2S4Zn1	icsd_640407
In2S5Zn2	icsd_042443
In2S5Zn2	icsd_042666
In2S6Zn3	icsd_068645
K1N7P4	icsd_410630
K1Na1O1	icsd_032743
K1O1Tl1	icsd_001570
K1O2Sb1	icsd_411214
K1O3P1	icsd_026148
K1O3Sb1	icsd_033546
K1S2Sn1	icsd_023448
K2Mo2O7	icsd_020133
K2O6S3	icsd_030990
K2Sb4Se8	icsd_402886
K3S4V1	icsd_074678
Li1Mn1O2	icsd_081049
Li1O2Sb1	icsd_262075
Li2Mn2O4	icsd_202500
Li2O3Te1	icsd_004317
Li2O3Te1	icsd_038416
Li7O6Sb1	icsd_015631
Mg2P2S6	icsd_413164
Mg2P2Se6	icsd_642731
Mn1P1Rb1	icsd_643229
Mn1P1S3	icsd_061391
Mn1P1Se3	icsd_054140
Mn1P1Ta1	icsd_085947
Mn1S4Sb2	icsd_056379
Mn1Si1Y1	icsd_643705
Mn2P2Se6	icsd_643239
Mo1N1Ta1	icsd_100437
Mo1O4Pb1	icsd_077336
Mo1O4Sr2	icsd_152123
Mo1O5V1	icsd_027315
Mo1O8V2	icsd_028471
Mo1O8V2	icsd_025378
Mo2O8Zr1	icsd_280436
N1Na1Sn1	icsd_172471
N7P4Rb1	icsd_410631
N9P1S1	icsd_261980
Na1P1Sn1	icsd_409010
Na2O4Pd3	icsd_006157
Nb1O5P1	icsd_024110
Nb1O5P1	icsd_051148
Nb1Pd1Te5	icsd_068103
Nb2Ni2Te4	icsd_084209
Nb3Si1Te6	icsd_071681
Ni1O3Ti1	icsd_033856
Ni1P1S3	icsd_646140
Ni1P1S3	icsd_061395
Ni1P1Se3	icsd_646146
Ni1S5Ta2	icsd_061147
Ni1Se5Ta2	icsd_061148
Ni1Se7Ta2	icsd_041619
Ni2Sb1Te2	icsd_099117
Ni2Ta1Te2	icsd_066346
Ni2Ta1Te3	icsd_082605
Ni2Ta2Te4	icsd_071063
Ni2Ta2Te4	icsd_071842
O2Rb1Sb1	icsd_411216
O3Pb1Rb2	icsd_001413
O3Pb1Se1	icsd_098376
O3Pb1V1	icsd_152277
O3Pd1Se1	icsd_249504
O3Pd1Se1	icsd_415955
O3Sb1Tl1	icsd_004123
O3Sb1Tl1	icsd_010142
O3Si1Zn1	icsd_167186
O4P1Sb1	icsd_015073
O4S1Sn1	icsd_002748
O4S1Sn1	icsd_245905
O4Sn1Sr2	icsd_150386
O4W1Zn1	icsd_162237
O5P1Ta1	icsd_087281
O5Sb2V1	icsd_203130
O6Pb1V2	icsd_036464
O6Pb3S1	icsd_030712
O8P2W1	icsd_050741
O8P2W1	icsd_024067
O9S1Zr3	icsd_068335
P1S3Zn1	icsd_079557
P1Sn1Sr1	icsd_063594
P1Te2Zr2	icsd_420650
P2Pd3S8	icsd_016296
P2S6Sn2	icsd_648055
P2S6Zn2	icsd_201933
P2Se6Zn2	icsd_413166
Pb2Pd3Te2	icsd_163134
Pb2S4Si1	icsd_016317
Pd1S6Ta2	icsd_061004
Pd1Se6Ta2	icsd_061005
Pd3Ta2Te5	icsd_078370
Pt1Se7Ta2	icsd_061353
Pt4Se6Tl2	icsd_078785
Pt4Te6Tl2	icsd_078787
Rb1S2Sn1	icsd_023449
Rb1S2Ti1	icsd_077990
Rb2Sb4Se8	icsd_402887
Rh1Ta1Te4	icsd_656453
Ru1Ta1Te4	icsd_656452
S2Sb1Tl1	icsd_035498
S4Si1Tl4	icsd_059170
S6Si2Tl4	icsd_035041
Sb1Se2Tl1	icsd_036537
Sb2Se1Te2	icsd_002085
Sb2Se2Te1	icsd_052295
Se4Ti1Zr1	icsd_104188
Se6Si2Tl4	icsd_035042
Si1Ta3Te6	icsd_075617
Si1Te1Zr1	icsd_652388
Si1Te1Zr1	icsd_074522
Te4Ti1Zr1	icsd_040496
