# Supplementary material for: Large piezoelectric response of van der Waals layered solids
Source: Royal Society of Chemistry journal article supplement (doi:10.1039/c8tc02560f), 2018-01-01
Supplement: c8tc02560f1.zip [file c8tc02560f1.zip › results-d-e-C.xlsx]

## Sheet: Sheet1
Compounds	ICSD	Eg	ICSD	d11	d12	d13	d14	d15	d16	d21	d22	d23	d24	d25	d26	d31	d32	d33	d34	d35	d36	e11	e12	e13	e14	e15	e16	e21	e22	e23	e24	e25	e26	e31	e32	e33	e34	e35	e36	C11	C12	C13	C14	C15	C16	C22	C23	C24	C25
Ag1I1	icsd_001899	1.2661	186	0	0	0	0	27.8	0	0	0	0	27.8	0	0	9.5	9.3	-19.4	0	0	0	0	0	0	0	0.1	0	0	0	0	0.1	0	0	0.1	0.1	-0.3	0	0	0	36.4	28.6	26.4	0	0	0	36.5	26.4	0	0
Ag2Ge1S3	icsd_041711	0.4344	36	0	0	0	0	8.8	-15.8	-3.6	-7.7	3.4	-1.8	0	0	6.5	-20	4.3	3.2	0	0	0	0	0	0	0.1	-0.2	-0.1	-0.2	0	-0.1	0	0	0.3	0	0.1	0.2	0	0	58	20.8	67.3	4.7	0	0	17.3	40.4	-0.3	0
Al2Cd1Cl8	icsd_062037	3.8112	7	-3.7	0.9	1.4	0	0	0.7	2.8	3.9	-3.2	0	0	-0.6	0	0	0	0	0	0	-0.1	0	0	0	0	0	0.1	0.1	0	0	0	0	0	0	0	0	0	0	32.6	9.6	8.7	0	0	0.9	25.8	8.7	0	0
Al2S4Zn1	icsd_609280	0.1355	160	0	0	0	0	-9.4	1.5	0.8	-0.8	0	-9.4	0	0	0.5	0.5	-19.6	0	-0.1	0	0	0	0	0	-0.2	0.1	0.1	-0.1	0	-0.2	0	0	-0.4	-0.4	-1.4	0	0	0	125.7	48	25	-4.4	-0.1	0.1	125.5	24.9	4.4	0
As1K1Sn1	icsd_040815	0.4586	186	0	0	0	0	11.3	0	0	0	0	11.3	0	0	6.7	6.7	-5.4	0	0	0	0	0	0	0	0.2	0	0	0	0	0.2	0	0	0.4	0.4	0	0	0	0	55.6	17.7	16.6	0	0	0	55.6	16.6	0	0
Au2O7Se2	icsd_037009	1.1026	32	0	0	0	0	14.5	0	0	0	0	0	0	0	-2.3	-2.5	9.3	0	0	0	0	0	0	0	0.1	0	0	0	0	0	0	0	-0.1	-0.1	0.3	0	0	0	62.8	42.4	16.1	0	0	0.1	126.4	34.1	0	0
B1N1	icsd_162871	4.1225	160	0	0	0	0	-0.8	1.4	0.7	-0.7	0	-0.8	0	0	0.1	0.1	-5	0	0	0	0	0	0	0	0	0.5	0.5	-0.5	0	0	0	0	0.1	0.1	-0.2	0	0	0	905.6	207.2	0.6	4.1	0	0	905.7	0.6	-4.1	0
Bi1Cl1Te1	icsd_079362	1.2025	186	0	0	0	0	-9.5	0	0	0	0	-9.4	0	0	-1.4	-1.4	-14.2	0	0	0	0	0	0	0	-0.1	0	0	0	0	-0.1	0	0	-0.3	-0.3	-0.4	0	0	0	50.7	18.6	14.3	0	0	0	50.7	14.3	0	0
Bi1I1Te1	icsd_074501	1.1566	143	0	0	0	0	-20	-18.9	-9.4	9.4	0	-19.8	0	0	0.3	0.3	15.2	0	0	0	0	0	0	0	-0.1	-0.2	-0.2	0.2	0	-0.1	0	0	0.2	0.2	0.4	0	0	0	47.3	13.7	11.9	-5.9	0	0	47.2	11.9	5.9	0
Bi1I1Te1	icsd_079364	1.1559	156	0	0	0	0	-20	-18.9	-9.4	9.4	0	-19.7	0	0	0.3	0.3	15.2	0	0	0	0	0	0	0	-0.1	-0.2	-0.2	0.2	0	-0.1	0	0	0.2	0.2	0.4	0	0	0	47.3	13.7	12	-5.9	0	0	47.3	12	5.9	0
Bi1In1O3	icsd_171756	2.7654	33	0	0	0	0	3.4	0	0	0	0	-3.6	0	0	-18.7	2.7	56.1	0	0	0	0	0	0	0	0.2	0	0	0	0	-0.2	0	0	1.3	1.9	4.7	0	0	0	198.1	95.9	84.5	0	0	0	177.3	57.3	0	0
Bi2Ge1O5	icsd_062488	2.3451	9	0	0	0	0	-10.4	0	-0.6	3	0.7	17.1	0	0	-1.9	9.1	21.1	-6.1	0	0	0	0	0	0	-0.4	0	0.4	0.6	0.7	0.5	0	0	1.3	1.7	3	-1.1	0	0	149.4	81	46.2	15.4	0	0.1	162.1	42.5	40.6	0
Bi2Mo1O6	icsd_017070	1.7382	61	12.1	6.7	0.9	3.5	-6.9	24.6	5.7	10.1	0	6.9	0.5	28.7	-3.6	3.7	0.1	-5.2	-7.3	-0.1	1.6	1	0.8	0.1	-0.3	1.1	0.8	1.3	0.6	0.3	0.1	1.3	-0.4	0.4	0	-0.3	-0.4	0	126.7	14.9	39.3	-2.3	1.9	-2	124.4	38	-2.5	2.8
Bi2O3	icsd_041764	1.3596	114	0	0	0	-15.4	0	0	0	0	0	0	-15.4	0	0	0	0	0	0	0	0	0	0	-0.5	0	0	0	0	0	0	-0.5	0	0	0	0	0	0	0	59	18.3	15.7	0	0	0	59	15.7	0	-0.1
Bi2O6W1	icsd_023584	1.7416	41	-0.1	2.9	8.8	0	-9.6	0	0	0	0	54.1	0	0	-0.3	9.6	19.6	0	0.2	0	0.3	0.8	1.3	0	-0.7	0	0	0	0	2.9	0	0	1.1	2.7	3.9	0	-0.7	0	135.1	66.5	42.4	0	42.7	0	189.4	45	0	13.5
Br1O3Tl1	icsd_076966	3.0105	160	-2.6	2.1	-0.7	1.5	-38.8	-5.3	-3	5	-1.7	-38.2	-1.9	0.3	4.2	4.8	-23.8	-2.2	2.2	4.1	-0.1	0	0	0	-1	-0.2	-0.1	0.2	0	-1	-0.1	0	-0.2	-0.2	-0.5	-0.1	0.1	0.1	56.7	20.3	16.8	-3	-0.3	-0.2	56.3	17.1	3.4	0
Br7Nb3S1	icsd_081078	0.7232	156	0	0	0	0	0.8	2.8	1.4	-1.4	0	0.8	0	0	-0.5	-0.5	5.8	0	0	0	0	0	0	0	0	0.1	0.1	-0.1	0	0	0	0	0	0	0.2	0	0	0	100.8	28.5	10	-2.4	0	0	100.8	10	2.4	0
Br7S1Ta3	icsd_051101	0.7795	8	-1.6	1.7	-0.1	0.1	12.2	0	0	0	0	13.5	0.1	3.4	-0.5	-0.5	6	0	-0.3	0	-0.1	0.1	0	0	0.1	0	0	0	0	0.1	0	0.1	0	0	0.2	0	0	0	110	30.3	10.9	-0.1	2.6	0	108.9	10.5	0	-2.5
Cl1K1O3	icsd_009483	4.7069	160	0.1	-0.5	-1.8	1.6	-8.3	0.7	-0.7	0	1.4	-8.3	-0.6	-1	7.4	4.8	-18.8	7.8	-4.4	-0.9	0	-0.1	0	0	-0.2	0	0	0	0	-0.2	0	0	0	-0.1	-0.2	0.1	-0.1	0	41.7	13.1	17.3	-2.2	0.1	-0.4	42.1	18.2	1.4	0.5
Cl2Mg1	icsd_051245	4.9269	164	0	0	0	0	23.5	0	0	0	0	-23.3	0	0	4.7	-4.7	0	0	0	0	0	0	0	0	0.2	0	0	0	0	-0.2	0	0	0.2	-0.2	0	0	0	0	46	3	12.1	0	0	0	46	12.1	0	0
Cl2Zr1	icsd_030052	0.9817	160	0	0	0	0	-0.4	1.8	0.9	-0.9	0	-0.5	0	0	0	0	0	0	0	0	0	0	0	0	0	0.1	0.1	-0.1	0	0	0	0	0	0	0	0	0	0	137.6	24.6	12.5	2.3	0	0	137.5	12.5	-2.3	0
Cl3F2Sb1	icsd_200039	1.4873	79	0	0	0	0	-24.4	0	-0.1	-0.1	0	-24.4	0	0	0.8	0.8	-6.7	0	0	0	0	0	0	0	-0.1	0	0	0	0	-0.1	0	0	0	0	-0.2	0	0	0	21.2	7.2	3.2	-0.1	0	3.6	21.1	3.2	-0.1	0
Co1F3	icsd_029133	0.2475	150	0.7	-0.7	0	0.6	0	0	0	0	0	0	-0.6	-1.3	0	0	0	0	0	0	0.1	-0.1	0	0.1	0	0	0	0	0	0	-0.1	-0.1	0	0	0	0	0	0	120.1	1.8	65.6	37.9	0	0	120.3	65.7	-37.9	0
Cs2Te3	icsd_053245	0.5441	36	17.5	12.5	7	9.8	0	0	0	0	0	0	17.6	23.4	0	0	0	0	23.5	31.3	0.6	0.7	0.4	0.2	0	0	0	0	0	0	0.2	0.3	0	0	0	0	0.3	0.4	24.5	6.7	11.8	0.4	0	0	14.5	7.8	0.7	0
Cu1O3V1	icsd_009414	0.9277	1	-31.5	15.3	-0.1	14.2	-25.8	43.9	24.8	106.9	5.4	-90.7	71.4	-14.3	11.3	-38.1	-6.9	48.5	12.5	55.1	-0.6	0.4	0.1	0	-0.2	-0.1	0.6	0.2	0.4	-0.6	0.9	0.1	0.6	-0.8	0.1	0.3	0.7	0.7	17.7	8.2	18.3	6.5	-13.1	-0.8	17.1	26.8	16	-10.7
Cu2S4W1	icsd_098909	1.4372	121	0	0	-0.1	-8.1	0	0	0	0	0	0	-8.1	0	0	0	0	0	0	0	0	0	0	-0.1	0	0	0	0	0	0	-0.1	0	0	0	0	0	0	0	116.4	13.3	11.6	-0.3	0	0.3	116.4	11.6	-0.3	0
Cu2S4W1	icsd_072529	1.2714	111	0	0	0	0	0	0	0	0	0	0	0	0	0	0	-0.1	0	0	5.4	0	0	0	0	0	0	0	0	0	0	0	0	0	0	0	0	0	0.1	113.8	12.7	7.8	-0.4	0	0.3	113.8	7.9	-0.4	0
F2N1P1	icsd_009684	5.6501	36	0	0	0	0	0	0	0.4	-0.9	-0.3	2.9	0	0	-0.7	1.7	0.5	-5.1	0	0.1	0	0	0	0	0	0	0	-0.1	0	0.1	0	0	0	0.2	0.1	-0.2	0	0	32.5	3.1	10.3	-2.5	-0.1	0	10.9	10.2	-3.9	0
F3Rh1	icsd_029134	0.46	150	1.4	-1.4	0	0.1	0	0	0	0	0	0	-0.1	-2.8	0	0	0	0	0	0	0.1	-0.1	0	0.1	0	0	0	0	0	0	-0.1	-0.1	0	0	0	0	0	0	73.8	4.5	51.9	32.9	0	0	74.1	52.1	-33.3	0.1
F5K1Sn2	icsd_036452	3.0081	143	2.9	-2.8	0.1	3.2	40.5	7.8	3.9	-3.9	0	39.9	-3.3	-5.8	1.6	1.6	7.8	0	0.2	0	0.2	-0.2	0	0	0.3	0.1	0.1	-0.1	0	0.3	0	-0.2	0.2	0.2	0.3	0	0	0	52.5	20.6	10.3	-0.4	2.6	0	52.6	10.3	0.4	-2.8
Ga1In1S3	icsd_062340	1.6307	36	0	0	0	0.7	0	0	0.9	-1.7	-0.7	0	-0.4	0	0	0	0	3.4	0	0	0	0	0	0	0	0	0	-0.2	-0.1	0	0	0	0	0	0	0.1	0	0	45.3	13.6	24.6	0	10.8	0	114.5	27.6	0	5.5
Ga1Se1	icsd_073387	0.7648	187	0	0	0	0	0	-6	-3	3	0	0	0	-3	0	0	0	0	0	0	0	0	0	0	0	-0.2	-0.2	0.2	0	0	0	-0.1	0	0	0	0	0	0	91.1	24.6	10.8	0	0	-0.1	91.2	10.9	0	0
Ga1Se1	icsd_660262	0.7648	174	0	0	0	0	0	-6	-3	3	0	0	0	-3	0	0	0	0	0	0	0	0	0	0	0	-0.2	-0.2	0.2	0	0	0	-0.1	0	0	0	0	0	0	91	24.6	10.8	0	-0.1	0	91.2	10.9	0	-0.1
Ga2Se2Te1	icsd_064617	1.5412	109	0	0	0	0	-5.3	0	0	0	0	-5.3	0	0	-1.6	-1.6	0.8	0	0	0	0	0	0	0	-0.1	0	0	0	0	-0.1	0	0	-0.1	-0.1	0	0	0	0	54.9	13.1	11.3	0	0	0	54.7	11.2	0	0
Ge1Hf1Te4	icsd_241122	0.2323	36	2.1	-3.8	13.7	1.5	0	0	0	0	0	0	2.2	9.6	0	0	0	0	20.6	0	0.3	-0.1	0.4	0	0	0	0	0	0	0	0	0.2	0	0	0	0	0.4	0	75.9	15.2	14.1	2.8	0	0	90.8	15.9	9.7	0
Ge1O3Zn1	icsd_183725	1.603	161	0	0	0	0	-1.1	0.9	0.5	-0.5	0	-1.1	0	0	0.6	0.6	-6.4	0	0	0	0	0	0	0	-0.1	0.1	0.1	-0.1	0	-0.1	0	0	-0.4	-0.4	-1.8	0	0	0	383.3	157.1	111.9	5.8	-0.1	0	383.1	111.8	-5.8	0
Ge1Te1	icsd_655497	0.5684	160	0	0	0	0	-148.4	83.9	39.8	-39.8	0.3	-145.8	2.2	-3.8	13.2	13.3	-60.3	0.2	0	0	0	0	0	0	-3.3	0.3	0.2	-0.2	0	-3.3	0	-0.1	0.1	0.1	-2.2	0	0	0	94.8	18.9	23.4	19.4	0	0	94.8	23.4	-19.3	0
Ge1Te4Zr1	icsd_240906	0.1907	36	-2.8	3.3	-9.7	-1.3	0	0	0	0	0	0	-1.2	-10.4	0	0	0	0	-16.2	0	-0.3	0.1	-0.3	0	0	0	0	0	0	0	0	-0.2	0	0	0	0	-0.3	0	72.4	14.2	14.5	2.9	0	0	88.2	15.5	9.6	0
Hg2P2S7	icsd_002490	1.7532	5	0	0	0	9.9	0	-5.2	-5.4	4.4	5.2	0	-7.8	0	0	0	0	-18.9	0	0.8	0	0	0	0.1	0	-0.1	-0.1	0.1	0.2	0	0	0	0	0	0	-0.2	0	0	60.4	28.8	12	0	-4.8	0	46.3	14.6	0	3
Hg3O6S1	icsd_024147	0.5529	152	-2.5	2.5	0	8.1	0	0	0	0	0	0	-8.1	4.9	0	0	0	0	0	0	-0.1	0.1	0	0.1	0	0	0	0	0	0	-0.1	0.1	0	0	0	0	0	0	127.6	89.6	47.9	-0.8	0	0	127.8	48	0.7	0
I2Pb1	icsd_024263	2.1623	186	0	0	0	0	15.2	0	0	0	0	15.2	0	0	0	0	0	0	0	0	0	0	0	0	0.1	0	0	0	0	0.1	0	0	0	0	0	0	0	0	24.4	10.6	9.4	0	0	0	24.4	9.4	0	0
I3Na1O8	icsd_418336	2.8408	81	0	0	0	48.4	-16	0	0	0	0	16.1	48	0	-17.7	17.7	0	0	0	24.8	0	0	0	0.6	-0.2	0	0	0	0	0.2	0.6	0	-0.7	0.7	0	0	0	0.5	55.1	14.5	11.6	0	0	0.8	55.1	11.6	0	0
I7Nb3Te1	icsd_086724	0.487	156	0	0	0	0	-11.9	3.9	1.9	-1.9	0	-11.9	0	0	0.7	0.7	-9.3	0	0	0	0	0	0	0	-0.1	0.1	0.1	-0.1	0	-0.1	0	0	0	0	-0.3	0	0	0	86.5	23.1	8.7	1.9	0	0	86.4	8.7	-1.9	0
In1Se1	icsd_041477	0.2727	160	-0.1	0	0.1	0.3	-9	-3.3	0	0	0	0	0	0	-5.6	-5.5	14	0.2	-0.4	0	0	0	0	0	-0.1	-0.1	0	0	0	0	0	0	-0.3	-0.3	0.3	0	0	0	63.7	20.7	12	3	-0.1	0	63.8	12.1	-3.1	0.1
In1Se1	icsd_640503	0.2465	187	0	0	0	0	0	-4.9	0	0	0	0	0	-4.9	0	0	0	0	0	0	0	0	0	0	0	-0.1	0	0	0	0	0	-0.1	0	0	0	0	0	0	62.7	21.8	12.9	0	0	0	62.7	12.9	0	0
In2S4Zn1	icsd_016200	0.1853	186	0	0	0	0	9.5	0	0	0	0	9.4	0	0	-1.8	-1.8	21	0	0	-0.1	0	0	0	0	0.1	0	0	0	0	0.1	0	0	0.3	0.3	1.2	0	0	0	98	43	26.4	0	0	0.1	98	26.4	0	0
In2S4Zn1	icsd_044637	0.1934	156	0	0	0	0	11.3	-4.7	-2.4	2.4	0	11.3	0	0	-1.5	-1.5	19	0	0	0.1	0	0	0	0	0.1	-0.1	-0.1	0.1	0	0.1	0	0	0.3	0.3	1.1	0	0	0	99.1	42.3	26.8	3	0	0	99	26.7	-3	0
In2S4Zn1	icsd_640407	0.2128	160	0	0	0	0	-8	2.8	1.4	-1.4	0	-8	0	0	1.4	1.4	-18.7	0	0.2	0	0	0	0	0	-0.1	0.1	0.1	-0.1	0	-0.1	0	0	-0.3	-0.3	-1.1	0	0	0	96.8	44.3	26.3	-3.3	0	0	97	26.3	3.3	0.1
In2Te5	icsd_000501	0.7036	9	5.9	0.1	-5.9	0	-351.7	0	0	0	0	-11.4	0	0	-3	0	4.6	0	0.2	0	0.1	0	-0.1	0	-2.6	0	0	0	0	-0.1	0	0	-0.1	0	0.1	0	0	0	52.9	14.9	12.6	0	0.4	0	33.4	9.4	0	0.1
Li7O6Sb1	icsd_015631	3.5905	146	-3.5	3.5	0	1.5	-4.2	4.3	2.1	-2.1	0	-4.2	-1.5	7	-0.9	-0.9	0.1	0	0	0	-0.3	0.3	0	0.1	-0.2	0.2	0.2	-0.2	0	-0.2	-0.1	0.3	-0.2	-0.2	-0.1	0	0	0	160.9	59.7	59.5	7.8	-9.8	0	161.1	59.6	-7.8	9.8
Mo1O8V2	icsd_025378	0.797	35	6.8	-3.9	-3	1.6	24.4	0	-1.6	-0.9	3.1	25.1	0.3	2.1	-8.1	-4.6	40.4	1.8	3.7	0.1	1.2	-0.4	-0.1	0.2	1	0	0	0	0.4	1.1	0	0.1	-0.2	-0.2	2.9	0.1	0	0	256.8	131.9	60.6	12.1	5.5	1.1	301.8	57.2	28.9	0.4
Mo1S2	icsd_038401	0.9923	160	0	0	0	0	-1.8	7.3	3.7	-3.7	0	-1.9	0	0	-0.1	-0.1	2.3	0	0	0	0	0	0	0	0	0.6	0.6	-0.6	0	0	0	0	0	0	0.1	0	0	0	223.8	57.4	14.4	4.3	0	0	223.7	14.4	-4.4	0
Mo1Se2	icsd_016948	0.9452	160	0	0	0	0	-2.4	9.2	4.6	-4.6	0	-2.4	0	0	-0.2	-0.2	2.4	0	0	0	0	0	0	0	0	0.6	0.6	-0.6	0	0	0	0	0	0	0.1	0	0	0	176.6	43.3	15.1	4.2	0	0	176.5	15.2	-4.2	0
N1Na1Sn1	icsd_172471	1.0971	186	0	0	0	0	-36.6	0	0	0	0	-36.6	0	0	-1.7	-1.7	-5.1	0	0	0	0	0	0	0	-0.6	0	0	0	0	-0.6	0	0	-0.4	-0.4	-0.5	0	0	0	154.9	36.2	15.2	0	0	0	154.8	15.2	0	0
N3Na1	icsd_029380	1.3957	12	-1.8	0.7	5.4	-3.5	12.6	6.8	29.1	-2.8	3.2	-10.5	21.1	-28.8	14.2	-19.7	-6.3	2.3	-9.4	-40.7	-0.1	-0.1	0	-0.1	0.1	0	0.5	0.4	0.1	-0.2	0.4	-0.3	-0.1	0	-0.2	0.3	-0.4	0.1	10.8	4.5	42.1	4	-19.2	-2	11.2	14.4	4.3	-6.4
Na1P1Sn1	icsd_409010	0.5876	186	0	0	0	0	-20.7	0	0	0	0	-20.7	0	0	-4.4	-2.8	0.5	0	0	0	0	0	0	0	-0.3	0	0	0	0	-0.3	0	0	-0.4	-0.3	-0.1	0	0	0	80.5	19.1	16.7	0	0	0	80.5	16.7	0	0
O1Sn1	icsd_020624	1.5948	31	0	0	0	0	0	4.1	-7.5	67.1	-21.8	0	0	0.1	0	0	0	-13.4	0	0	0	0	0	0	0	0.1	0.3	1.1	-0.1	0	0	0	0	0	0	-0.2	0	0	104.4	17.2	3.5	0	0	0	21.8	10.8	0	0
O3Pb1Rb2	icsd_001413	1.3177	36	0	0	0	0	-11.9	15.8	8.3	-7.1	-2	-16.6	0	0	-11	4.7	5.3	22.2	0	0	0	0	0	0	-0.1	0.2	0.2	-0.1	0	-0.5	0	0	-0.3	0.1	0.1	0.7	0	0	69.7	17.1	30.5	9.2	0	0	41.6	30.7	-7.7	0
O5Sb2V1	icsd_203130	0.3379	31	0	0	0	0	0	0	0.1	-0.4	0.8	0	0	0	0	0	0	10.3	0	0	0	0	0	0	0	0	0	0	0.1	0	0	0	0	0	0	0.2	0	0	120.7	36.9	7	-0.1	0	0	39.8	17.6	0	0
Pb1S1	icsd_183255	0.22649	186	0	0	0	0	30.5	0	0	0	0	30.5	0	0	-13	-13	161.4	0	0	0	0	0	0	0	1	0	0	0	0	1	0	0	2.7	2.7	8.3	0	0	0	66.3	32.6	24.7	0	0	0	66.3	24.7	0	0
S2Sn1	icsd_043003	1.0884	186	0	0	0	0	-9.5	0	0	0	0	-9.5	0	0	0	0	0	0	0	0	0	0	0	0	-0.1	0	0	0	0	-0.1	0	0	0	0	0	0	0	0	123	32.7	12.4	0	0	0	123	12.4	0	0
S2W1	icsd_202367	1.1725	160	0	0	0	0	-1.1	4.3	2.1	-2.1	0	-1.1	0	0	-0.1	-0.1	2.2	0	0	0	0	0	0	0	0	0.4	0.4	-0.4	0	0	0	0	0	0	0.1	0	0	0	243.5	55.2	13.5	4.1	0	0	243.4	13.5	-4.1	0
[truncated: 11 more columns]
